1           **Transcriptional, post-transcriptional, and post-translational mechanisms**  
2           **rewrite the tubulin code during cardiac hypertrophy and failure**

3  
4   **Sai Aung Phy<sup>1,2</sup>, Keita Uchida<sup>2</sup>, Christina Yingxian Chen<sup>2</sup>, Matthew A. Caporizzo<sup>2</sup>,**  
5   **Kenneth Bedi<sup>3</sup>, Joanna Griffin<sup>3</sup>, Kenneth Margulies<sup>3</sup>, Benjamin L. Prosser<sup>2\*</sup>**

6  
7   <sup>1</sup> Department of Genetics & Epigenetics, University of Pennsylvania Perelman School of  
8   Medicine, Philadelphia, PA, USA.

9   <sup>2</sup> Department of Physiology, Pennsylvania Muscle Institute, University of Pennsylvania  
10   Perelman School of Medicine, Philadelphia, PA, USA.

11   <sup>3</sup> Department of Medicine, Cardiovascular Institute, University of Pennsylvania Perelman  
12   School of Medicine, Philadelphia, PA, USA.

13  
14   **\*Correspondence:**

15   Benjamin L. Prosser, Ph.D., Department of Physiology, Pennsylvania Muscle Institute,  
16   Cardiovascular Institute, University of Pennsylvania Perelman School of Medicine, Clinical  
17   Research Bldg Room 726, 415 Curie Blvd, Philadelphia PA 19104, Email:

18   [bpros@pennmedicine.upenn.edu](mailto:bpros@pennmedicine.upenn.edu)

19  
20   **Keywords:** Hypertrophy, Heart failure, Tubulin isoforms, Transcription, Autoregulation

21 **Abstract**

22

23 A proliferated and post-translationally modified microtubule network underlies cellular  
24 growth in cardiac hypertrophy and contributes to contractile dysfunction in heart failure. Yet  
25 how the heart achieves this modified network is poorly understood. Determining how the  
26 “tubulin code” – the permutations of tubulin isoforms and post-translational modifications - is  
27 rewritten upon cardiac stress may provide new targets to modulate cardiac remodeling. Further,  
28 while tubulin can autoregulate its own expression, it is unknown if autoregulation is operant in  
29 the heart or tuned in response to stress. Here we use heart failure patient samples and murine  
30 models of cardiac remodeling to interrogate transcriptional, autoregulatory, and post-  
31 translational mechanisms that contribute to microtubule network remodeling at different stages  
32 of heart disease. We find that autoregulation is operant across tubulin isoforms in the heart and  
33 leads to an apparent disconnect in tubulin mRNA and protein levels in heart failure. We also find  
34 that within 4 hours of a hypertrophic stimulus and prior to cardiac growth, microtubule  
35 detyrosination is rapidly induced to help stabilize the network. This occurs concomitant with  
36 rapid transcriptional and autoregulatory activation of specific tubulin isoforms and microtubule  
37 motors. Upon continued hypertrophic stimulation, there is an increase in post-translationally  
38 modified microtubule tracks and anterograde motors to support cardiac growth, while total  
39 tubulin content increases through progressive transcriptional and autoregulatory induction of  
40 tubulin isoforms. Our work provides a new model for how the tubulin code is rapidly rewritten to  
41 establish a proliferated, stable microtubule network that drives cardiac remodeling, and provides  
42 the first evidence of tunable tubulin autoregulation during pathological progression.

43 **Abbreviations and Acronyms**

44

45 HF – Heart Failure

46 PTM – Post-Translational Modification

47 MAP – Microtubule-Associated Proteins

48  $\alpha$ TAT1 –  $\alpha$ -Tubulin acetyltransferase 1

49 VASH1/2 – vasohibins 1 & 2

50 HW – Heart Weight

51 TL – Tibia Length

52 LV – Left-Ventricle

53 Ctrl – Vehicle control

54 PE – Phenylephrine

55 Iso – Isoproterenol

56 IEG – Immediate Early Gene

57 DEG – Differentially Expressed Gene

## 58 **Introduction**

59

60 Heart Failure (HF) is a complex pathological condition in which cardiac performance  
61 fails to match systemic demand. HF is commonly preceded by an enlargement of the heart  
62 known as cardiac hypertrophy, which serves as a major risk factor for progression to HF. As  
63 such, understanding the molecular determinants of hypertrophy may reveal novel targets for HF  
64 prevention.

65

66 Microtubules are hollow tubes formed from the polymerization of  $\alpha$ - and  $\beta$ - tubulin  
67 dimers that play essential roles in the structural support of cells, intracellular transport, and cell  
68 division. They exhibit stochastic growth and shrinkage and maintain a dynamic equilibrium  
69 between free and polymerized tubulin (S. Fig. 1A). Through their trafficking role, microtubules  
70 regulate cardiomyocyte electrical activity, mitochondrial dynamics, protein degradation and local  
71 translation, while also forming load-bearing structures that influence myocyte mechanics and  
72 mechano-signaling(Caporizzo et al. 2019).

73

74 During cardiac hypertrophy and heart failure, the microtubule network is significantly  
75 remodeled and acts as a double-edged sword. On one hand, a proliferated, stable microtubule  
76 network is essential for the development of cardiac hypertrophy in response to stressors such as  
77 adrenergic stimulation and hemodynamic overload(Sato et al. 1997; Fassett et al. 2009, 2019;  
78 Scarborough et al. 2021). Upon such hypertrophic stimuli, a dense microtubule network and the  
79 anterograde motor protein kinesin-1 coordinates the trafficking of mRNA and the translational  
80 machinery to control local synthesis and integration of nascent proteins(Scarborough et al. 2021).  
81 In the absence of microtubules, increased protein translation is decoupled from protein  
82 integration and the heart fails to grow(Scarborough et al. 2021), identifying an essential role of  
83 microtubule-based transport in adaptive cardiac growth.

84

85 Yet upon chronic stress, the densified microtubule network can also contribute to  
86 contractile dysfunction in HF(Tsutsui et al. 1999; Caporizzo et al. 2018; Chen et al. 2018). A  
87 collective body of research has established a causal link between aberrant microtubule network  
88 remodeling and impaired cardiac mechanics in HF. Tubulin mass, and consequently microtubule  
89 network density, is consistently increased in the myocardium of HF patients(Chen et al. 2018;  
90 Schuldt et al. 2020) and pressure-overloaded animals(Sato et al. 1997; Fassett et al. 2019), and  
91 its destabilization can improve dysfunctional cardiac mechanics(Tsutsui et al. 1993; Cheng et al.  
92 2008; Chen et al. 2018; Caporizzo et al. 2020).

93

94 While the state of the microtubule network in advanced HF has been well-defined by  
95 recent studies(Chen et al. 2018; Schuldt et al. 2020), we know little about the drivers and  
96 temporal progression of changes to the microtubule network that occur during cardiac  
97 remodeling. A seemingly obvious mechanism to increase tubulin mass is transcriptional  
98 upregulation; yet when we examine published transcriptomic and proteomic data from HF  
99 samples, we observe a surprising but consistent inverse correlation between tubulin mRNA and  
100 protein levels across different causes of HF in multiple studies (Fig. 1A-B). This motivates a  
101 deeper examination between transcriptional and translation coupling of tubulin isoforms and  
102 other factors that could contribute to microtubule proliferation.

103

104           There are a multitude of  $\alpha$  and  $\beta$  tubulin isoforms that arise from alternative tubulin  
105 genes; in humans, there are nine  $\alpha$  and nine  $\beta$  -tubulin isoforms, and in mice, seven  $\alpha$  and eight  $\beta$   
106 isoforms (S. Fig. 1B). The abundance of tubulin transcripts can be controlled through  
107 autoregulation, a tubulin-specific mRNA rheostat in which an excess of free tubulin can activate  
108 a ribosomal RNase to degrade nascent tubulin transcripts (autoinhibition); conversely, if free  
109 tubulin levels are reduced, autoregulation is released (autoactivation) to promote tubulin  
110 synthesis and restore free tubulin content(Gasic and Mitchison 2019) (Fig. 1C). The extent to  
111 which tubulin isoforms are controlled through transcriptional or autoregulatory mechanisms has  
112 not been characterized, and autoregulation has not been examined in any capacity in the heart.  
113 Finally, any pathological relevance of autoregulation in cardiac or other tissues is largely  
114 unexplored.

115  
116           The stabilization (i.e., protection from breakdown) of polymerized microtubules is  
117 another potentially important driver of the dense microtubule network observed in hypertrophy  
118 and HF. Microtubules are stabilized through association with microtubule-associated proteins  
119 (MAPs) and motors as well as through post-translational modifications (PTMs) of tubulin (S. Fig  
120 1). Acetylation of polymerized  $\alpha$ -tubulin produces long-lived and resilient microtubules that are  
121 resistant against repeated mechanical stresses(Kalebic et al. 2013) (Portran et al. 2017), while  
122 deetyrosination - the removal of a tyrosine residue on the C-terminal tail of  $\alpha$ -tubulin by  
123 vasohibins 1 & 2 (VASH1/2)(Aillaud et al. 2017; Nieuwenhuis et al. 2017) – stabilizes  
124 microtubules by modulating their interactions with depolymerizing effector proteins (Peris et al.  
125 2009; Chen et al. 2021). The permutations of PTMs and tubulin isoforms is known as the  
126 “tubulin code” (S. Fig 1), which creates microtubule networks with distinct biochemical and  
127 mechanical properties. Altered deetyrosination(Chen et al. 2018; Yu et al. 2021),  
128 acetylation(Swiatlowska et al. 2020), and MAP(Cheng et al. 2010; Li et al. 2018; Yu et al. 2021)  
129 binding are each implicated in pathological cardiac remodeling; yet how the tubulin code is  
130 rewritten during cardiac hypertrophy and HF remains largely unclear.

131  
132           In this study, we interrogate changes to the tubulin code, MAPs, and motors at discrete  
133 stages of pathological cardiac remodeling. We find that surprisingly rapid and isoform-specific  
134 transcriptional induction and autoactivation of tubulin mRNA combine with post-translational  
135 deetyrosination to drive microtubule stabilization and proliferation during early cardiac growth.  
136 We also find that in progressed heart failure, there is a switch to autoinhibition that reduces  
137 tubulin mRNA expression in the face of elevated tubulin protein content. This work identifies  
138 roles for autoregulation in rewriting the tubulin code during cardiac remodeling and may inform  
139 on approaches intended to modulate the course of hypertrophy and its progression to HF.

## 140 **Methods**

141

### 142 **Human myocardial tissue**

143

144 Procurement of human myocardial tissue was performed under protocols and ethical  
145 regulations approved by Institutional Review Boards at the University of Pennsylvania and the  
146 Gift-of-Life Donor Program (Pennsylvania, USA) and as described(Chen et al. 2018). In  
147 summary, failing human hearts were procured at the time of orthotropic heart transplantation at  
148 the Hospital of the University of Pennsylvania following informed consent from all participants.  
149 Non-failing hearts were obtained at the time of organ donation from cadaveric donors. In all  
150 cases, hearts were arrested in situ using ice-cold cardioplegia solution and transported on wet ice.  
151 Transmural myocardial samples were dissected from the mid left ventricular free wall below the  
152 papillary muscle and the samples were kept frozen at 80°C. Contractile parameters, including left  
153 ventricle ejection fraction, were determined by echocardiography in subjects. In this study, a  
154 total of 35 donor hearts were used. 12 donors were classified as near-normal non-failing (NF)  
155 without left-ventricular hypertrophy, and 23 donors were classified as heart failure with 12 hearts  
156 from hypertrophic cardiomyopathy patients and 11 hearts from dilated cardiomyopathy patients.

157

### 158 **Animal care**

159

160 Animal care and procedures were approved and performed in accordance with the  
161 standards set forth by the University of Pennsylvania Institutional Animal Care and Use  
162 Committee (IACUC) and the Guide for the Care and Use of Laboratory Animals published by  
163 the US National Institutes of Health (NIH).

164

### 165 **Drug injection**

166

167 Eight to twelve weeks old male C57/Bl6 mice were used throughout the study. On days 0  
168 and 2, based on their body weights, mice were subcutaneously injected with either ascorbic acid  
169 (Ctrl, Sigma-Aldrich: A92902), 10mg/kg phenylephrine (PE, Sigma-Aldrich: P6126) prepared in  
170 Ctrl, or 5mg/kg isoproterenol (Iso, Sigma-Aldrich: I6504) prepared in Ctrl.

171

### 172 **Cardiac Tissue Harvest**

173

174 Mice were put under general anesthesia using isoflurane and the hearts were surgically  
175 removed. Excised hearts were thoroughly washed in ice-cooled PBS and extra-cardiac tissues  
176 were removed. To properly measure heart weight (HW), residual blood from the chambers was  
177 removed by sandwiching the heart between Kimwipes and gently squeezing it. After HW  
178 measurement, atrial and right ventricular tissues were removed, the remaining septal and left-  
179 ventricular tissues were cut into five pieces of similar size and from similar locations of the  
180 heart. The weights of the individual pieces were recorded, frozen in liquid nitrogen, and stored at  
181 -80°C until further processing. Concurrent with tissue harvest, the tibia length (TL) of respective  
182 mouse was measured to calculate HW-over-TL (HW/TL).

183

### 184 **Exclusion criteria**

185

186 During the study: for the 4-hour time point, there were 6 mice per treatment group for a  
187 total of 18 mice, and for the 4-day time point, there were 8 mice per treatment group for a total of  
188 24 mice. As we aimed to study mice who underwent consistent cardiac hypertrophy, for the 4-  
189 day time point, we set exclusion criteria as the followings: (1) hearts whose HW/TL were beyond  
190 2 standard-deviations (SD) of the population mean, and (2) experimental hearts whose classical  
191 hypertrophy response genes were not changed relative to that of the control hearts. After the  
192 removal of outliers, in the final study: for the 4-hour time point, there are 6 mice per treatment  
193 group for a total of 18 mice, and for the 4-day time point, there are 7 mice in Ctrl, 7 mice in PE,  
194 and 6 mice in Iso, for a total of 20 mice.

195

## 196 **Mouse cardiomyocyte isolation, culture, and drug treatment**

197

198 Primary adult ventricular myocytes were isolated from 8- to 12-week-old C57/Bl6 mice  
199 using the protocol previously described(Prosser et al. 2011). Briefly, mice were put under  
200 general anesthesia using isoflurane and were injected peritoneally with heparin (~1000 units/kg).  
201 The heart was excised and cannulated to a Langendorff apparatus for retrograde perfusion with  
202 enzymatic digestion solution at 37°C. Once digested, the heart was minced and triturated with  
203 glass pipettes. The isolated cardiomyocytes were centrifuged at 300 revolution per minute for 2  
204 minutes. The supernatant containing debris was discarded and the isolated cells were  
205 resuspended in cardiomyocyte media containing Medium 199 (GIBCO: 11150-59) supplemented  
206 with 1x insulin-transferrin-selenium-X (GIBCO: 51500-56), 20mM HEPES pH 7.4, 0.1 mg/mL  
207 Primocin, and 25 µmol/L of cytochalasin D. Immediately following cell isolation, the  
208 cardiomyocytes were treated with either DMSO, 10µM colchicine, or 10µM taxol, and incubated  
209 at 37°C and 5% CO<sub>2</sub> for 6 hours.

210

## 211 **Echocardiography**

212

213 On day 4, transthoracic echocardiography was performed on mice, which were  
214 anesthetized using intraperitoneal injection of 0.01mL/gram body-weight of 2.5% Avertin, using  
215 Vevo2100 Ultrasound System (VisualSonics Inc., Toronto, Ontario, Canada). Fractional  
216 shortening, chamber dimensions, and ventricular wall-thickness were measured from short axis  
217 M-mode images at the mid-level view of the papillary muscle.

218

## 219 **Total protein lysate preparation**

220

221 Frozen aliquoted cardiac tissue obtained from similar locations of the heart was  
222 pulverized finely using a liquid nitrogen-cooled mortar and pestle. 1x Radioimmunoprecipitation  
223 assay (RIPA) buffer (Cayman Chemical Company: 10010263) supplemented with 1x protease  
224 inhibitor cocktail (Cell Signaling Technology: 5872S) and 1:200 diluted endonuclease (Lucigen:  
225 OC7850K) was immediately added to the pulverized tissue at a constant ratio of 15µL/mg of  
226 tissue. The sample was then mechanically homogenized using a handheld homogenizer until  
227 visible chunks of tissues were dissociated. The sample was incubated for 10 minutes on ice to  
228 allow endonuclease to cleave DNA. After processing of all samples, the samples underwent two  
229 freeze-thaw cycles, after which, equal-volume of 5% SDS-10% glycerol boiling (SGB) buffer  
230 was added to each sample. The samples were vortexed thoroughly then heated to 100°C for 8  
231 minutes. Residual undissolved cell debris were removed from the resulting samples by

232 centrifugation at 8000g for 5 minutes at room temperature (22°C). The concentrations of the total  
233 protein were determined using Bicinchoninic acid (BCA) assay; all samples were diluted to  
234 4µg/µL using RIPA:SGB buffer. The diluted total protein lysates were aliquoted and stored at -  
235 80°C until further processing.

236

### 237 **Microtubule Fractionation**

238

239 100mM PIPES-KOH pH 6.8, 1mM MgCl<sub>2</sub>, 1mM EGTA-KOH pH 7.7 (PME) buffer was  
240 prepared fresh and was supplemented with 1mM DTT, 1mM GTP (Sigma-Aldrich: G8877), and  
241 1x protease inhibitor cocktail. 7 parts supplemented PME buffer was mixed with 3 parts  
242 glycerol; the final PME-30G buffer was kept incubated in a 37°C water bath. Frozen aliquoted  
243 cardiac tissue obtained from similar locations of the heart was pulverized crudely using a liquid  
244 nitrogen-cooled mortar and pestle. Immediately following pulverization, warmed PME-30G  
245 buffer was added at a constant ratio of 20µL/mg of tissue. The sample was then mechanically  
246 homogenized using the handheld homogenizer until visible chunks of tissues were dissociated  
247 and was set aside at 22°C until all samples were processed. All processed samples were then  
248 centrifuged at 16000g for 15 minutes at 30°C; the supernatants were transferred into fresh tubes  
249 and were saved as free tubulin (Free) fractions. 10µL of 1 part RIPA and 1 part SGB  
250 (RIPA:SGB) buffer was added to the pellet obtained from 1mg of tissue and the sample was  
251 homogenized using the handheld homogenizer. After processing of all samples, the samples were  
252 heated to 100°C for 8 minutes, cooled on ice, and centrifuged at 8000g for 5 minutes at 22°C; the  
253 supernatants were transferred into fresh tubes and were saved as polymerized tubulin (Poly)  
254 fractions. The concentrations of the Poly fractions were determined using BCA assay. The Poly  
255 fractions were diluted to 4µg/µL using RIPA:SGB buffer; the respective Free fraction was  
256 diluted with PME-30G buffer using twice the volume needed to dilute the Poly fraction. The  
257 final diluted Free and Poly fractions were aliquoted and stored at -80°C until further processing.

258

### 259 **Sample preparations and Western blot (WB) analysis**

260

261 To quantify the relative abundance of specific proteins of interest in the total protein  
262 lysate, aliquoted diluted total protein lysate samples were thawed at 22°C. 1 part 4x loading  
263 buffer (125mM Tris-HCl pH 6.8, 35% v/v glycerol, 0.2% w/v Orange G) freshly supplemented  
264 with 10% v/v β-mercapthoethanol (BME) was mixed with 3 parts total protein lysate to get final  
265 concentrations of 1x loading buffer with 2.5% BME, and 3µg/µL of total protein. The final  
266 samples were heated to 100°C for 8 minutes. The heated samples were cooled to 22°C,  
267 centrifuged briefly, vortexed thoroughly, and loaded 5µL/sample onto precast protein gels (Bio-  
268 Rad: 5671085).

269 To quantify the relative abundances of the Free and Poly fractions, aliquoted diluted Free  
270 and Poly fractions were thawed at 22°C. For the Free fractions, 2x loading buffer (62.5mM Tris-  
271 HCL pH 6.8, 5% v/v SDS, 0% glycerol, 0.1% w/v Orange G) freshly supplemented with 5% v/v  
272 BME was used, whereas, for the Poly fractions, 4x loading buffer freshly supplemented with  
273 10% v/v BME was used; to prepare the final samples, the respective loading buffers were diluted  
274 to 1x using the Free and Poly fractions. The final samples were heated to 100°C for 8 minutes.  
275 The heated samples were cooled to 22°C, centrifuged briefly, vortexed thoroughly, and loaded  
276 5µL/Poly fraction and 10µL/Free fraction onto precast protein gels.

277



278 Protein gel electrophoresis was carried out under constant voltage of 135V for the Midi  
 279 gels for 1 hour. The resolved proteins were transferred onto a nitrocellulose membrane using the  
 280 Turbo Transfer System (Bio-Rad) under recommended conditions. The post-transferred  
 281 membrane was blocked in blocking buffer (LI-COR Biosciences: 927-60003) for at least 1 hour  
 282 at 22°C (or overnight at 4°C). The blocked membrane was incubated overnight at 4°C with  
 283 primary antibodies diluted in 1x Tris buffered saline with Tween-20 (TBST, Cell Signaling  
 284 Technology: 9997S). The membrane was washed twice using TBST, and incubated for 1 hour at  
 285 22°C with secondary antibodies diluted in blocking buffer. The final immunoblotted membrane  
 286 was washed twice using TBST and was imaged using the Odyssey Western Blot Imaging System  
 287 (LI-COR Biosciences).

## 288 289 **WB data analysis**

290  
 291 The WB data was analyzed using Image Studio Lite (LI-COR Biosciences). The signal  
 292 intensity of an individual band was obtained by drawing a rectangular block encompassing the  
 293 entire band. The background was thresholded using the parameters: median, border width = 3,  
 294 Top/Bottom. 2 technical replicates (n) per sample, and 6 biological replicates (N) per treatment  
 295 for 4-hour time point and 8 biological replicates per treatment for 5-day time point were used in  
 296 the analysis. GAPDH intensity was used as a loading control. A mean value of the Ctrl that  
 297 were run on the same blot was used to normalize the data and to calculate the relative fold-  
 298 changes over the Ctrl. Statistical analyses were performed as described below.

## 299 300 **Primary and secondary antibodies**

301

| Target                     | Vendor        | Host Species | Clonal | Product No. | Concentration used in WB (µg/mL) |
|----------------------------|---------------|--------------|--------|-------------|----------------------------------|
| Total α-tubulin            | Abcam         | Mouse        | Mono   | ab7291      | 0.33                             |
| Total α-tubulin            | Abcam         | Rabbit       | Poly   | ab4074      | 0.5                              |
| Total β-tubulin            | Abcam         | Rabbit       | Poly   | ab6046      | 0.67                             |
| Acetylated α-tubulin       | Abcam         | Mouse        | Mono   | ab24610     | 1                                |
| Detyrosinated α-tubulin    | Abcam         | Rabbit       | Poly   | ab48389     | 1                                |
| Polyglutamylated α-tubulin | Adipogen      | Mouse        | Mono   | 50-436-394  | 2                                |
| Δ2 α-tubulin               | Moutin Lab    | Rabbit       | Poly   |             | 1:5000                           |
| Polyglycylated tubulin     | EMD Millipore | Mouse        | Mono   | MABS276     | 2                                |
| GAPDH                      | GenScript     | Mouse        | Mono   | A01622-40   | 0.5                              |
| H3                         | Abcam         | Mouse        | Mono   | ab24834     | 0.33                             |
| Anti-mouse                 | LI-COR        | Donkey       | Poly   | 925-32212   | 0.1                              |
| Anti-rabbit                | LI-COR        | Donkey       | Poly   | 925-68073   | 0.1                              |

302  
303

## 304 **Mass spectrometry (MS) sample preparation**

305

306 To quantify the relative changes of multiple proteins of interest in the total protein lysate,  
307 aliquoted diluted total protein lysate samples were thawed at 22°C. 1 part 4x loading buffer  
308 freshly supplemented with 10% v/v BME was mixed with 3 parts total protein lysate. The final  
309 samples were heated to 100°C for 8 minutes. The heated samples were cooled to 22°C,  
310 centrifuged briefly, vortexed thoroughly, and loaded 50µL/sample onto precast protein gels (Bio-  
311 Rad: 4561034). Protein gel electrophoresis was carried out under constant voltage of 110V for  
312 the Mini gels for 1.5 hours. The resolved protein gel was stained with Coomassie blue (Bio-Rad:  
313 1610435) using the provided protocol. After the destaining of the gel, the 50kDa bands were  
314 carefully excised and stored in deionized water at 4°C until further processing.

315 The gel bands were destained with 100mM ammonium bicarbonate/acetonitrile (50:50).  
316 The bands were reduced in 10mM dithiothreitol/100mM Ammonium bicarbonate for over 60  
317 minutes at 52°C; the bands were then alkylated with 50mM iodoacetamide/100mM ammonium  
318 bicarbonate at 22°C for 1 hour in the dark. The proteins in the gel bands were digested with  
319 enzymes while incubating overnight at 37°C; different enzymes such as trypsin, Chymotrypsin,  
320 and Glu-C were used according to protein sequences. The supernatants were transferred and  
321 kept in fresh tubes. Additional peptides were extracted from the gel by adding 50%  
322 acetonitrile/1% TFA and incubated for 10 minutes on a shaker. The supernatants were combined  
323 and dried. The dried samples were reconstituted using 0.1% formic acid for MS analysis.

324

## 325 **MS analysis using Nano-LC-MS/MS**

326

327 Peptides were analyzed on a Q-Exactive HF (Thermo Fisher Scientific) attached to an  
328 Ultimate 3000 rslcnano system (Thermo Fisher Scientific) at 400 nL/min. Peptides were eluted  
329 with a 55 minutes gradient from 5% to 32% ACN (25 minutes) and 90% ACN over 5 minutes in  
330 0.1% formic acid. Data-dependent acquisition mode with a dynamic exclusion of 45 seconds was  
331 enabled. One full MS scan was collected with a scan range of 350 to 1200  $m/z$ , resolution of 70  
332 K, maximum injection time of 50 milliseconds, and AGC of  $1 \times 10^6$ . Then, a series of MS2 scans  
333 were acquired for the most abundant ions from the MS1 scan (top 12). Ions were filtered with  
334 charges 2–4. An isolation window of 2  $m/z$  was used with quadruple isolation mode. Ions were  
335 fragmented using higher-energy collisional dissociation (HCD) with a collision energy of 27%.  
336 Orbitrap detection was used with a scan range of 140 to 2000  $m/z$ , resolution of 30 K, maximum  
337 injection time of 54 milliseconds, and AGC of 50,000.

338

## 339 **MS data analysis**

340

341 Proteome Discoverer (Thermo Fisher Scientific, version 2.4) was used to process the raw  
342 spectra. Default search parameters were used, including precursor mass tolerance of 10 ppm,  
343 fragment mass tolerance of 0.02 Da, enzymes specific cleavage, and up to 2 mis-cleavage.  
344 Carbamidomethyl [C] was set as a fixed modification, while Oxidation [M] and Acetylation [N-  
345 terminal and K] were set as variable modifications. The target-decoy approach was used to filter  
346 the search results, in which the false discovery rate was less than 1% at the peptide and protein  
347 levels. For measuring the relative protein abundances, all the chromatographic data were  
348 aligned and normalized to peptide groups and protein abundances, missing values were imputed  
349 and scaled. Since the different tubulin isoforms share multiple homologies between one another,

350 only unique peptides that are unambiguous to each isoform was used to calculate protein  
351 abundance. The unique peptide acquired for the analyzed isoforms range from 1-13 and the full  
352 suite of peptide and protein groups used in the analysis can be found in the public proteomic  
353 repository as outlined in the data availability statement. Statistical analyses were performed on  
354 the calculated protein abundances as described below.

355

### 356 **Total RNA extraction**

357

358 Frozen aliquoted cardiac tissue obtained from similar locations of the heart was  
359 pulverized finely using a liquid nitrogen-cooled mortar and pestle. 500 $\mu$ L of ice-cooled RNazol  
360 (Molecular Research Center: RN 190) was added to the pulverized tissue and immediately  
361 homogenized using the handheld homogenizer until visible chunks of tissues were dissociated.  
362 200 $\mu$ L of molecular grade water was added to the sample; the sample was vortexed and  
363 incubated for 15 minutes at 22°C. After processing of all samples, the samples were then  
364 centrifuged at 12000g for 15 minutes at 22°C. 550 $\mu$ L of the clear supernatant was carefully  
365 removed and transferred into a fresh tube. 550 $\mu$ L of isopropanol was then added to the  
366 supernatant, vortexed, and incubated for 10 minutes at 22°C. The samples were centrifuged at  
367 16000g for 10 minutes at 22°C, and the resulting supernatants were discarded. The visible RNA  
368 pellets were washed in 75% ethanol in molecular grade water three times. The undried RNA  
369 pellets were resuspended in 30 $\mu$ L of RNase free water. The total RNA concentrations, and  
370 260/230 and 260/280 ratios were determined using NanoDrop ND-1000 Spectrophotometer  
371 (NanoDrop Technologies). The RNA samples were stored at -80°C until further analysis.

372

### 373 **NanoString nCounter analysis**

374

375 Total RNAs from 37 samples were analyzed. The concentration of the total RNA was  
376 reassessed using NanoDrop spectrophotometer. The quality of the total RNA was assessed using  
377 the Agilent 4200 TapeStation (Agilent Technologies). Only samples that were pure as defined by  
378 OD 260/280 and 260/230 ratios  $> 1.8$ , and integrity RIN value  $> 8.0$  were used in the study.  
379 100ng of total RNA per sample for tubulin and hypertrophy panels or 200ng of total RNA per  
380 sample for tubulin autoregulation panel was used for the subsequent step. Hybridization between  
381 the target mRNA and reporter-capture probe pairs was performed for 18 hours at 65°C using  
382 Mastercycler Pro S Thermal Cycler (Eppendorf) according to the manufacturer's protocol. Post-  
383 hybridization processing was carried out on a fully automated nCounter Prep Station  
384 (NanoString Technologies) liquid-handling robotic device using the High Sensitivity setting. For  
385 image acquisition and data processing, the probe/target complexes were immobilized on the  
386 nCounter cartridge that was then placed in the nCounter Digital Analyzer (NanoString  
387 Technologies) as per the manufacturer's protocol with FOV set to 555. The expression level of a  
388 gene was measured by counting the number of times the probe with a unique barcode, which was  
389 targeted against that gene, was detected. The barcode counts were then tabulated in a comma-  
390 separated value (.csv) format.

391

### 392 **NanoString nCounter data and statistical analysis**

393

394 The raw digital counts of expressions were exported into nSolver Analysis software  
395 (NanoString, version 4.0) for downstream analysis. The data was analyzed in nSolver using the

396 Nanostring Analysis and Advanced Analysis software packages. The background of the data was  
397 thresholded using the geometric means after removing negative control values that are three-  
398 times higher than the rest. The data was then normalized using the geometric means of the  
399 positive controls, after removing “F” if the value is too close to background, and the three  
400 housekeeping genes (Gapdh, Rpl4, Tbp). Without removing low count values, the Bonferroni-  
401 corrected differentially expressed gene (DEG) analysis of the normalized data was computed  
402 using Treatment as covariates. For tubulin autoregulation panel, raw counts were exported, and  
403 statistical analyses were carried as outlined below.

404

## 405 **Statistical Analysis**

406

407 Graphing and statistical analyses were performed using OriginPro 2019 software  
408 (OriginLabs). First, the normality of the data was determined using the Shapiro-Wilk test. For  
409 comparison of data distributions whose normality cannot be rejected at 0.05 level, the calculated  
410 probability of the means ( $p$ ) between the control and the experimental group was calculated  
411 using the two-tailed two-sample Welch-corrected student’s t-test. For comparison of data  
412 distributions whose normality is rejected at 0.05 level, the  $p$ -value between the control and the  
413 experimental group was calculated using the two-tailed two-sample Kolmogorov-Smirnov test.  
414 For significance level, we used the Bonferroni-corrected significance cut-off of  $p < 0.025$   
415 denoted by \* ; \*\* represents  $p < 0.01$  and \*\*\* represents  $p < 0.001$ . P-values to two significant  
416 figures were reported for  $0.05 < p < 0.025$ . For all bar graphs, the bar represents mean and the  
417 whisker represents + 1 SEM. For all box plots, the bolded line represents mean, and the whiskers  
418 represent  $\pm 1$  standard error of mean (SEM).

419

## 420 **Results**

421

### 422 **Tubulin autoregulation is operant in the heart and induced in heart failure**

423

424 Despite the importance of microtubule proliferation in cardiac pathology, any role of  
425 tubulin autoregulation has not been examined. We utilized a previously established strategy to  
426 test for autoregulation by measuring the relative abundances of pre-spliced (i.e. intron-  
427 containing) and spliced (i.e. those without introns) tubulin mRNAs (Gasic et al. 2019). Using this  
428 approach, one can detect transcriptional regulation of a target through correlated changes in  
429 intronic and exonic mRNA levels ( $y = x$  in Fig. 1E, for example), whereas post-transcriptional  
430 autoregulation would only affect exonic mRNA (shift along the y-axis of Fig. 1E). To study  
431 autoregulation in an isoform-specific fashion, we designed NanoString nCounter probes for  
432 direct and unique detection of either intronic or exonic regions of individual tubulin isoforms. To  
433 determine if autoregulation is operant in heart muscle cells, we treated isolated mouse  
434 cardiomyocytes for 6 hours with colchicine, a microtubule depolymerizing agent predicted to  
435 trigger autoinhibition (decrease in only exonic species) by increasing free tubulin, or taxol, a  
436 microtubule polymerizing agent predicted to trigger autoactivation (increase in only exonic  
437 species) by shifting free tubulin into the polymerized pool. Consistently, depolymerization  
438 significantly reduced the amount of exonic but not intronic mRNA across most tubulin isoforms,  
439 while polymerization increased the amount of exonic tubulin mRNA (Fig. 1D-E). This data  
440 serves as the first demonstration that autoregulation is operant in the cardiomyocyte and that it  
441 regulates the majority of tubulin isoforms.

442

443 Next, we tested whether tubulin autoregulation can partially explain the discrepancy in  
444 mRNA and protein levels observed in HF. To this end, we designed a separate Nanostring probe  
445 set against introns and exons of human tubulin isoforms and probed RNA extracted from 35  
446 cardiac samples from 12 non-failing donors or 23 patients with advanced heart failure. Figure  
447 1F-G shows the relative intronic and exonic abundances for all tubulin isoforms that could be  
448 readily detected at the intronic, exonic and protein level (Chen et al. 2018) (Figure 1A-B). In  
449 failing hearts, the majority of tubulin isoforms showed reduced exonic relative to intronic levels,  
450 indicative of active autoinhibition across most isoforms. An exception is *TUBA1A*, the only  
451 isoform that demonstrated significant transcriptional induction; consistently *TUBA1A* is also  
452 being the only isoform to show both increased and correlated mRNA and protein levels in this  
453 HF population (Figure 1A-B). Of additional note, *TUBB4B* is by far the most abundant  $\beta$ -tubulin  
454 isoform expressed in the heart, and it exhibits robust autoinhibition in HF, yet maintains  
455 increased protein abundance. Taken together this data indicates that in HF, elevated tubulin  
456 protein triggers persistent autoinhibition of tubulin mRNA. The maintained elevation in tubulin  
457 protein may be explained by significantly increased tubulin stability/lifetime.

458

459 However, there remains no explanation as to how the heart achieved the increased tubulin  
460 protein in the first place or whether autoregulation plays any role in the establishment of the  
461 increased tubulin mass observed in pathological cardiac remodeling. To better understand this,  
462 we employed mice models of cardiac hypertrophy that allows us to explore the early roles of  
463 tubulin transcription, autoregulation, and stability.

464

### 465 **Acute adrenergic agonism induces anatomic and transcriptional cardiac remodeling**

466  
467  
468  
469  
470  
471  
472  
473  
474  
475  
476  
477  
478  
479  
480  
481  
482  
483  
484  
485  
486  
487  
488  
489  
490  
491  
492  
493  
494  
495  
496  
497  
498  
499  
500  
501  
502  
503  
504  
505  
506  
507  
508  
509  
510

To determine how the microtubule network remodels during the development of cardiac hypertrophy, we characterized the myocardial cytoskeleton at two time points in two mouse models of adrenergic agonist-induced hypertrophy(Scarborough et al. 2021) (Fig. 2A). A 4-hour post-injection time point was chosen to capture a stage when hearts were exposed to hypertrophic stimuli but have not yet hypertrophied, i.e. pre-hypertrophy, and a 4-day post-injection time point was chosen to capture a stage when hearts had demonstrably hypertrophied. As expected, no change in heart-weight-to-tibia-length (HW/TL) was observed 4 hours after injection of either phenylephrine (PE) or isoproterenol (Iso) compared to vehicle control (Ctrl) (Fig. 2B, left). When mice were given a second injection on day 2 and hearts were collected on day 4, we observed a consistent cardiac hypertrophy with both PE and Iso (Fig. 2B, right). To assess left-ventricular remodeling and function, we performed echocardiography on the 4-day hypertrophy animals. We observed consistent evidence of concentric hypertrophy upon both PE and Iso treatment, with elevated left-ventricular (LV) mass and increased wall and septal thickness (Fig. 2C-D). Neither group exhibited evidence of decompensation toward HF, with no evidence of ventricular dilation, or depressed contractility, indicating a compensated, concentric hypertrophy in response to acute adrenergic agonism.

We further validated our models using NanoString nCounter to assess transcriptional markers of cardiac remodeling in the hearts of PE and Iso treated mice. Using direct RNA counting of 42 transcripts sorted into immediate early genes (IEGs), hypertrophy-related genes, and fibrosis-related genes, we analyzed differentially expressed genes (DEGs) in the septa and LV of our time-matched control and experimental groups. We hypothesized that IEGs would be upregulated after 4-hour of adrenergic stimulation, followed by upregulation of canonical markers of hypertrophic remodeling after 4 days. Consistent with this hypothesis, we observed robust upregulation of the canonical IEGs – *cMyc* and *cFos* – in both PE and Iso treated mice at 4-hour (Fig. 2E & S. Fig. 2), followed by induction of stress markers – *Nppa* and *Nppb* – at 4-day, along with markers of fetal reprogramming including myosin isoform switching (reduced *Myh6:Myh7* ratio).

The full complement of DEGs in each experimental group at the 4-hour and 4-day time points are depicted in S. Fig. 2. At both 4-hour and 4-day after adrenergic agonism, we observed upregulation of hypertrophy-related gene *Fhl1*(Friedrich et al. 2012), and fibrosis-related genes *Ctgf*(Hayata et al. 2008) & *Vcan*(Vistnes et al. 2014). Additional potentially relevant DEGs included the upregulation of *Col4a1*(Steffensen and Rasmussen 2018) and *Timp1*(Barton et al. 2003), and the downregulation of *Agrn*(Bassat et al. 2017; Baehr et al. 2020), among others.

### **The microtubule network is rapidly detyrosinated upon hypertrophic stimulation**

Having validated the 4-hour and 4-day models, we examined microtubule network remodeling in these contexts. We first determined whether the total  $\alpha\beta$ -tubulin content and free vs. polymerized tubulin pools are altered in the pre-hypertrophic state, i.e. 4-hour. We observed no significant differences in these metrics of total tubulin content or fractionation at this early time point (Fig. 3A-C).

511 We next determined whether tubulin is rapidly post-translationally modified upon  
512 hypertrophic stimulation. We immunoblotted for the five best-studied PTMs using validated  
513 antibodies: acetylation, detyrosination, polyglutamylation, polyglycylation, and  $\Delta 2$  tubulin.  
514 Polyglutamylation, polyglycylation, and  $\Delta 2$  are well characterized in cilia, flagella, and the  
515 brain(Paturle-Lafanechère et al. 1994; Aillaud et al. 2016), but they have not been studied in the  
516 heart. Detyrosination and acetylation, which occur predominantly on polymerized microtubules,  
517 are common markers of stable, long-lived microtubules, and of microtubule damage and repair-  
518 stabilization processes(Portran et al. 2017; Xu et al. 2017) respectively.

519  
520 At the 4-hour time point, we did not observe any significant differences in either the  
521 absolute (PTM/GAPDH) or the relative (PTM/ $\alpha$ -tubulin) amounts of acetylation,  
522 polyglutamylation, polyglycylation, or  $\Delta 2$  tubulin (Fig. 3D, F-H). Surprisingly, we did observe  
523 robust induction of the absolute and relative amounts of detyrosination in both PE and Iso treated  
524 groups (Fig. 3E). These data suggest that within 4 hours of hypertrophic stimulation, prior to  
525 other overt changes in tubulin mass, microtubules are rapidly detyrosinated, which could be an  
526 early driver of microtubule stabilization.

527  
528 **Post-translationally modified microtubules proliferate during the establishment of cardiac**  
529 **hypertrophy**

530  
531 We next characterized microtubule network remodeling at day 4, concurrent with cardiac  
532 hypertrophy. We probed the 3 tubulin pools and immunoblotted for  $\alpha$ -tubulin,  $\beta$ -tubulin,  
533 acetylation, detyrosination, polyglutamylation, polyglycylation,  $\Delta 2$  as described above.

534  
535 At this stage we observed increased free, polymerized, and total  $\alpha\beta$ -tubulin protein in the  
536 hearts of PE and Iso-treated mice (Fig. 4A-C). In the PE group, the ratio of free:polymerized  $\alpha$ -  
537 tubulin decreased (S. Fig. 3D), consistent with enhanced microtubule stability. In PE-treated  
538 mice, we observed increases in the absolute amounts of acetylation, polyglutamylation, and  
539 polyglycylation, and in the absolute and relative amounts of detyrosination. Iso treated mice  
540 showed a similar trend for each PTM, but of reduced magnitude and greater variability (Fig. 4C-  
541 H). Taken together, these data indicate that during cardiac hypertrophy tubulin content increases,  
542 the polymerized network densifies, and there is a proportionally increased abundance of post-  
543 translationally modified microtubules with a modest enrichment of detyrosination.

544  
545 We next sought to determine how specific tubulin isoforms contribute to the increase in  
546 tubulin content observed at 4-day. To this end, we utilized mass spectrometric (MS) analysis of  
547 the total tubulin pool. We observed that the predominant  $\alpha$ - and  $\beta$ -tubulin isoforms of murine  
548 LV were Tuba1a and Tubb4b, respectively (Fig. 5A). Each of these predominant isoforms were  
549 modestly increased upon PE and Iso treatment. We also determined the relative changes of all  
550 detectable tubulin isoforms and observed significant increases in Tuba1a, Tuba1c, Tubb2a,  
551 Tubb2b, Tubb3, Tubb5, and Tubb6 (Fig. 5A-B). Of note, Tuba4a – the only tubulin isoform that  
552 is synthesized in its detyrosinated form – was clearly not increased upon hypertrophic  
553 stimulation. This indicates that the early increases in detyrosination are not due to increased  
554 synthesis of Tuba4a, and instead likely due to altered activity of the enzymes of the tyrosination  
555 cycle. Tubb6 exhibited the highest degree of upregulation with a ~4-fold increase upon PE  
556 treatment; this is notable as Tubb6 induction has been causally implicated in microtubule

557 network reorganization in Duchenne Muscular Dystrophy(Randazzo et al. 2019). Despite  
558 significant upregulation of multiple low abundance isoforms, the overall composition of the total  
559 tubulin pool is largely conserved at this stage of hypertrophic remodeling.

560

### 561 **Transcriptional analysis of $\alpha\beta$ -tubulin isoforms, tubulin modifying enzymes, and MAPs** 562 **during the induction and establishment of hypertrophy**

563

564 We next examined the contribution of transcriptional changes to the protein and network  
565 level microtubule remodeling at 4-hour and 4-day. To this end, we utilized NanoString analysis  
566 of total RNA using another set of 47 genes that includes tubulin isoforms, tubulin modifying  
567 enzymes, and MAPs.

568

569 While tubulin protein content was unchanged 4-hour after adrenergic stimulation, we  
570 noted significant upregulation of several tubulin transcripts with both PE and Iso treatment at this  
571 stage, including *Tuba1c*, *Tubb2a* and *Tubb6*, with additional and more robust upregulation of  
572 *Tubb2b* and *Tubb3* by day 4 (Fig. 5C). Consistent with proteomics assessments, *Tuba4a* and  
573 *Tuba8* were either unchanged or even downregulated upon PE and Iso treatment.

574

575 Regardless of the directionality of response, specific tubulin isoforms generally  
576 responded similarly to either adrenergic stimulus (Fig. 5C). Further, in contrast to what was  
577 observed in advanced HF, transcript levels were also well-correlated with protein abundance  
578 across most isoforms at the 4-day time point ( $R^2 = 0.38$ , slope = 0.20,  $p = 1.4e-4$ ) (Fig. 5D).  
579 Consistent with protein expression lagging transcriptional regulation, the four isoforms (*Tuba4a*,  
580 *Tuba8*, *Tubb2b*, *Tubb3*) that displayed the greatest deviation in the change in the mRNA relative  
581 to the change in the protein levels (i.e. located furthest away from the  $y = x$  line when plotting  
582  $\log_2FC$  in mRNA vs protein levels) were transcripts that showed delayed regulation; these  
583 isoforms were unchanged after 4-hour but differentially expressed by 4-day. Consistent  
584 upregulation at the transcript and protein level was seen for *Tuba1c*, *Tubb2a*, *Tubb2b*, *Tubb3*,  
585 and *Tubb6*. Combined with the early upregulation of tubulin transcripts, this data indicates that  
586 increased tubulin mRNA at least partly underlies the isoform-specific increase in tubulin protein,  
587 and therefore tubulin mass, that is necessary for hypertrophic remodeling(Sato et al. 1997;  
588 Tsutsui et al. 1999; Scarborough et al. 2021).

589

590 We noted several additional transcriptional changes of tubulin modifying enzymes and  
591 MAPs that may bear relevance to cardiac remodeling and warrant further investigation (Fig. 5E-  
592 F; S. Fig. 4). These include: (1) *Vash2*, which encodes a tubulin detyrosinase, exhibited the  
593 greatest differential expression among the 47 assessed transcripts at the 4-hr PE time point; this  
594 may contribute to the robust early induction of detyrosination in this group (2) Early  
595 upregulation of *Kif5b* in PE(Tigchelaar et al. 2016) after 4-hour, which encodes the primary  
596 transport kinesin heavy chain 1 implicated in mRNA transport during myocyte  
597 growth(Scarborough et al. 2021); (3) upregulation of *Mapre1* in both PE and Iso at 4-hour,  
598 which encodes a member of microtubule associated protein RP/EB family of +TIP tracking  
599 protein that guides microtubule growth; (4) Robust upregulation of *Kif15* in both PE and Iso by  
600 day 4, which encodes a kinesin family member implicated in stabilizing parallel growing  
601 microtubules; (5) induction of *Map1a* in both PE and Iso at 4-day, which encodes a stabilizing  
602 structural MAP.



603  
604  
605  
606  
607  
608  
609  
610  
611  
612  
613  
614  
615  
616  
617

All tubulin-associated transcript volcano plots (S. Fig. 4) were asymmetric, tending to show a greater degree of upregulated than downregulated genes, implying a generalized induction of a tubulin-associated program at 4-day. This was particularly evident in the PE groups, and with progressive upregulation from the 4-hour to 4-day time point. There were, however, notable down-regulated transcripts. While kinesin isoforms, which encode plus-end directed anterograde motors, were generally upregulated in treated groups, transcripts encoding subunits of the dynein/dynactin minus-end directed motor (*Dynll2*, *Dync1h1*, *Dctn2*) were either downregulated or unchanged (Fig. 5F). This preferential induction of anterograde motors would bias trafficking toward the microtubule plus-end and away from the minus-end, which has implications for directed cardiac growth and for autophagic flux, which requires minus-end directed transport (McLendon et al. 2014). We also noted the early downregulation of enzymes involved in the polyglutamylation cycle, such as cytosolic carboxypeptidase 5 (*Ccp5*) and TTL-like family members 1 and 5 (*Tll1/5*), which were all reduced in PE and Iso at the 4-hour time point (S. Fig. 4).

618  
619  
620  
621  
622  
623  
624  
625  
626

To determine the conservation of these tubulin-associated transcriptional responses across varied hypertrophic stimuli, we compared our data with publicly available RNA sequencing datasets from two separate studies that examined early time-points following pressure-overload and angiotensin II induced hypertrophy. While data is not available for all transcripts, transcripts reported across studies demonstrate well-conserved transcriptional signatures at both early (hours) and later (days) timepoints (S. Fig. 5), including the consistent upregulation of most  $\alpha\beta$ -tubulin isoforms but with the notable downregulation of *Tuba4a* and *Tuba8*.

627  
628  
629

### **Transcriptional and autoregulatory mechanisms underlie isoform-specific increases in $\alpha\beta$ -tubulin mRNA**

630  
631  
632  
633  
634  
635  
636  
637  
638  
639  
640  
641  
642  
643  
644  
645  
646  
647

The above transcriptional and proteomic profiling indicates that the upregulation of tubulin mRNAs is an early driver of microtubule proliferation during the development of hypertrophy. This may arise from two non-exclusive mechanisms – (1) increased transcription or (2) decreased autoregulation (i.e., autoactivation). To this end, we utilized the tubulin isoform and location -specific approach outlined above to interrogate the mechanism of tubulin upregulation during cardiac hypertrophy. Overall, we observed in almost all our tested tubulin isoforms exonic level increases that exceed intronic level increases, suggesting a generalized autoactivation of tubulin isoforms driven by microtubule stabilization (Fig. 6). The most prominent cases of autoactivation are that of *Tubb2b*, whose increase in transcript level is solely through an increase in exonic level at both 4-hour and 4-day, and *Tuba1a*, whose immediate response at 4-hour was through an increase in exonic level with no change in intronic level (Fig. 6A). Additionally, in a subset of the tubulin isoforms – *Tuba1b*, *Tubb2a*, *Tubb5*, and *Tubb6* – we observed robust increases in the intronic levels that could be explained by the direct transcriptional activation of the hypertrophic stimuli (Fig. 6B, S. Fig. 6). Interestingly, despite a generalized upregulation and autoactivation of tubulin isoforms in the early stages of hypertrophy, *Tuba4a* and *Tuba8* are downregulated and autoinhibited, respectively. These data collectively show that  $\alpha\beta$ -tubulin mRNA is controlled in an isoform-specific and time-dependent

648 fashion through both transcriptional and autoregulatory mechanisms to rewrite the tubulin code  
649 during cardiac remodeling.  
650

## 651 **Discussion**

652

653 In this work we combined transcriptomic and proteomic assessments in advanced heart  
654 failure samples and temporally well-defined murine models of cardiac remodeling to understand  
655 how a dense and modified microtubule network is achieved. Among other observations  
656 expanded upon below, we arrive at three primary conclusions: 1) tubulin autoregulation is  
657 operant in the heart and represses tubulin isoform mRNA expression in HF, contributing to the  
658 observed discrepancy between RNA and protein levels in HF; 2) the microtubule network is  
659 rapidly post-translationally detyrosinated within 4 hours of a hypertrophic stimuli; 3)  
660 concomitantly, the abundance of tubulin mRNA is rapidly altered in an isoform-specific fashion  
661 through both transcriptional and autoregulatory mechanisms; 4) the time-dependent upregulation  
662 of discrete  $\alpha\beta$ -tubulin transcripts drives an increase in microtubule mass during cardiac  
663 hypertrophy.

664

665 Combining our work with past literature, we arrive at a sequential model for the  
666 formation of a proliferated and stabilized microtubule network in the remodeled heart (S. Fig. 7).  
667 Within hours of a hypertrophic stimuli and prior to detectable growth, the microtubule network is  
668 detyrosinated (Fig. 3E). Our data indicate that this increase in detyrosination is due to  
669 transcriptional (Fig. 5E) or post-translational (Yu et al. 2021) upregulation of the recently  
670 identified detyrosinating enzyme complex, as opposed to previously proposed mechanisms such  
671 as increased *Tuba4a* expression (Fig. 5C), increased polymerized or long-lasting microtubule  
672 substrate (Fig. 3C-D), or decreased TTL expression (S. Fig. 3B, E). Detyrosination serves as a  
673 network stabilizer to protect microtubules from breaking down by regulating their interaction  
674 with effector proteins (Peris et al. 2009; Chen et al. 2021). Microtubule stabilization, in turn,  
675 shuttles free tubulin into the polymerized microtubule pool, triggering autoactivation that  
676 increases tubulin mRNA stability and translation. How autoregulation may achieve isoform-  
677 specificity is not understood, although indicated by our data (see *Tubb2b* vs. *Tuba8*, Fig. 6F). In  
678 concert with post-transcriptional upregulation of tubulin mRNA, increased transcription of  
679 several isoforms concomitantly increases tubulin mRNA. Independent of the mode of  
680 upregulation, tubulin mRNAs appear to be efficiently translated, as mRNA levels are well  
681 correlated with peptide abundance across tubulin isoforms (Fig. 5D). As the stimuli persists and  
682 the heart enlarges, the newly translated tubulin is integrated into the microtubule network,  
683 resulting in increased microtubule mass and additional substrate for post-translational  
684 modifications (Fig. 4).

685

686 Insights into tubulin isoforms in muscle biology have pointed towards the potential  
687 detrimental effects of specific isoforms in muscle pathologies; for example, TUBB6 is  
688 upregulated in dystrophic skeletal muscles, and it contributes to microtubule disorganization and  
689 altered muscle regeneration in muscular dystrophy (Randazzo et al. 2019), and elevated  
690 TUBA4A in human cardiomyopathy contributes to the increased detyrosination that impedes  
691 myocyte function (Chen et al. 2018; Schuldt et al. 2020) (Fig. 5B). Strikingly, when we examine  
692 publicly available transcriptomic and proteomic data from chronically hypertrophied or failing  
693 human hearts (Fig. 1A), we observe an inverse relationship between the transcript and the protein  
694 levels of all  $\alpha\beta$ -tubulin isoforms. It is worth noting that TUBA8 behaves as an outlier, the lone  
695 tubulin transcript that is consistently *increased* in HF while the protein level is consistently  
696 *decreased*. Intriguingly, *Tuba8* was also the sole isoform to clearly escape autoactivation (and

697 appear seemingly autoinhibited) during early hypertrophic remodeling (Fig. 6F). We have no  
698 current explanation for how or why Tuba8 shows unique regulation in both settings. In contrast  
699 to inverse relationship in HF, we observed that during the establishment of hypertrophy,  
700 transcript and protein levels are highly correlated, suggesting an uncoupling of transcript and  
701 protein levels that occurs later in the course of cardiac remodeling. Chronic, robust microtubule  
702 stabilization and increased tubulin lifetime could account for the stably elevated tubulin protein  
703 content despite persistent autoinhibition that we observe in HF.

704  
705 Our analysis permits the temporal evaluation of several cytoskeletal- or hypertrophy-  
706 associated factors at distinct stages representing the onset and establishment of cardiac  
707 hypertrophy. Beyond the key conclusions listed above, several additional observations on  
708 cytoskeletal remodeling are of note. The association of the microtubule network with motor  
709 proteins such as kinesins alters its mechano-biochemical properties as well as its density. As an  
710 example, Kif15 (kinesin-12) has been shown to cross-link nearby parallel microtubules, causing  
711 them to bundle, and subsequently decreases the catastrophic events of dynamic  
712 microtubules(Drechsler and McAinsh 2016). Interestingly, during both PE and Iso -induced  
713 hypertrophy, *Kif15* is upregulated, suggesting that *Kif15* could contribute to microtubule network  
714 densification. Kif5b (Kinesin-1), the predominant anterograde motor in the heart, was previously  
715 reported to be increased in PE induced-hypertrophy of neonatal rat ventricular  
716 cardiomyocytes(Tigchelaar et al. 2016). We observed similar and rapid increase in Kif5b  
717 transcript and protein levels in our hypertrophy models (Fig. 5F, S. Fig. 3C, F). Kinesin-1 was  
718 recently identified to be required for the distribution of mRNA and ribosomes that enables  
719 cardiomyocyte hypertrophy (Scarborough et al. 2021), and past work indicates that kinesin-1  
720 prefers to transport cargo along deetyrosinated microtubule tracks(Kaul et al. 2014). Meanwhile,  
721 the dynein/dynactin retrograde motor protein complex (transcriptionally downregulated, Fig. 5F),  
722 prefers tyrosinated microtubule tracks(Nirschl et al. 2016). Taking together, these observations  
723 suggest that the heart both rapidly induces its primary anterograde transport motor and remodels  
724 its preferred tracks in response to a hypertrophic stimulus.

725  
726 Our findings indicate that rapid transcriptional, autoregulatory, and post-translational  
727 mechanisms remodel the microtubule network following a hypertrophic stimulus. Contextualized  
728 with past literature, these changes will support the ability of the microtubule network to bear  
729 increased mechanical load, facilitate mechanotransduction, and enhance transport of the  
730 translational machinery that is required for growth. In summary, the data points towards a  
731 concerted and adaptive response to establish hypertrophy, and we provide a resource for further  
732 investigation into the diverse roles of microtubules in cardiac remodeling.

733 **Conflict of Interest**

734

735 The authors declare no conflict of interest.

736

737 **Author Contributions**

738

739 SP and BP designed the study. SP, KU, CC, MC, JG and KB performed data acquisition and  
740 analysis. SP and BP wrote the manuscript, and all authors assisted in editing.

741

742 **Funding**

743

744 Funding for this work came was provided by the National Institute of Health (NIH) R01s-  
745 HL133080 and HL149891 to B. Prosser, T32 HL007843 to K. Uchida, by the Fondation Leducq  
746 Research Grant no. 20CVD01 to B. Prosser, and by the Center for Engineering Mechanobiology  
747 to B. Prosser through a grant from the National Science Foundation's Science and Technology  
748 program: 15-48571.

749

750 **Acknowledgment**

751

752 We thank the Mouse Cardiovascular Phenotyping Core of the Cardiovascular Institute at the  
753 University of Pennsylvania for the echocardiography, the Quantitative Proteomics Resource  
754 Core of School of Medicine at the University of Pennsylvania for the mass spectrometry, the  
755 Penn Center for Musculoskeletal Disorders Histology Core (P30-AR069619) & the Genomics  
756 Core at the Wistar Institute for the NanoString analyses. Some of the figures were created by  
757 BioRender.com.

758 **References**

759  
760

- 761 Aillaud C, Bosc C, Peris L, Bosson A, Heemeryck P, Dijk JV, et al. Vasohibins/SVBP are  
762 tubulin carboxypeptidases (TCPs) that regulate neuron differentiation. *Science*.  
763 2017;358(6369):1448–53.
- 764 Aillaud C, Bosc C, Saoudi Y, Denarier E, Peris L, Sago L, et al. Evidence for new C-terminally  
765 truncated variants of  $\alpha$ - and  $\beta$ -tubulins. *Mol Biol Cell*. 2016;27(4):640–53.
- 766 Baehr A, Umansky KB, Bassat E, Jurisch V, Klett K, Bozoglu T, et al. Agrin Promotes  
767 Coordinated Therapeutic Processes Leading to Improved Cardiac Repair in Pigs. *Circulation*.  
768 2020;142(9):868–81.
- 769 Barton PJR, Birks EJ, Felkin LE, Cullen ME, Koban MU, Yacoub MH. Increased expression of  
770 extracellular matrix regulators TIMP1 and MMP1 in deteriorating heart failure. *J Hear Lung*  
771 *Transplant*. 2003;22(7):738–44.
- 772 Bassat E, Mutlak YE, Genzelinakh A, Shadrin IY, Umansky KB, Yifa O, et al. The extracellular  
773 matrix protein agrin promotes heart regeneration in mice. *Nature*. 2017;547(7662):179–84.
- 774 Caporizzo MA, Chen CY, Bedi K, Margulies KB, Prosser BL. Microtubules Increase Diastolic  
775 Stiffness in Failing Human Cardiomyocytes and Myocardium. *Circulation*.  
776 2020;141(11):902–15.
- 777 Caporizzo MA, Chen CY, Prosser BL. Cardiac microtubules in health and heart disease. *Exp*  
778 *Biol Med*. 2019;244(15):1255–72.
- 779 Caporizzo MA, Chen CY, Salomon AK, Margulies KB, Prosser BL. Microtubules Provide a  
780 Viscoelastic Resistance to Myocyte Motion. *Biophys J*. 2018;115(9):1796–807.
- 781 Chen CY, Caporizzo MA, Bedi K, Vite A, Bogush AI, Robison P, et al. Suppression of  
782 detyrosinated microtubules improves cardiomyocyte function in human heart failure. *Nat*  
783 *Med*. 2018;24(8):1225–33.
- 784 Chen J, Kholina E, Szyk A, Fedorov VA, Kovalenko I, Gudimchuk N, et al.  $\alpha$ -tubulin tail  
785 modifications regulate microtubule stability through selective effector recruitment, not  
786 changes in intrinsic polymer dynamics. *Dev Cell*. 2021;
- 787 Cheng G, Takahashi M, Shunmugavel A, Wallenborn JG, DePaoli-Roach AA, Gergs U, et al.  
788 Basis for MAP4 Dephosphorylation-related Microtubule Network Densification in Pressure  
789 Overload Cardiac Hypertrophy. *J Biol Chem*. 2010;285(49):38125–40.

- 790 Cheng G, Zile MR, Takahashi M, Baicu CF, Bonnema DD, Cabral F, et al. A direct test of the  
791 hypothesis that increased microtubule network density contributes to contractile dysfunction  
792 of the hypertrophied heart. *Am J Physiol-heart C*. 2008;294(5):H2231–41.
- 793 Drechsler H, McAinsh AD. Kinesin-12 motors cooperate to suppress microtubule catastrophes  
794 and drive the formation of parallel microtubule bundles. *Proc National Acad Sci*.  
795 2016;113(12):E1635–44.
- 796 Fassett J, Xu X, Kwak D, Zhu G, Fassett EK, Zhang P, et al. Adenosine kinase attenuates  
797 cardiomyocyte microtubule stabilization and protects against pressure overload-induced  
798 hypertrophy and LV dysfunction. *J Mol Cell Cardiol*. 2019;130:49–58.
- 799 Fassett JT, Xu X, Hu X, Zhu G, French J, Chen Y, et al. Adenosine regulation of microtubule  
800 dynamics in cardiac hypertrophy. *Am J Physiol-heart C*. 2009;297(2):H523–32.
- 801 Friedrich FW, Wilding BR, Reischmann S, Crocini C, Lang P, Charron P, et al. Evidence for  
802 FHL1 as a novel disease gene for isolated hypertrophic cardiomyopathy. *Hum Mol Genet*.  
803 2012;21(14):3237–54.
- 804 Gasic I, Boswell SA, Mitchison TJ. Tubulin mRNA stability is sensitive to change in  
805 microtubule dynamics caused by multiple physiological and toxic cues. *Plos Biol*.  
806 2019;17(4):e3000225.
- 807 Gasic I, Mitchison TJ. Autoregulation and repair in microtubule homeostasis. *Curr Opin Cell  
808 Biol*. 2019;56:80–7.
- 809 Hayata N, Fujio Y, Yamamoto Y, Iwakura T, Obana M, Takai M, et al. Connective tissue growth  
810 factor induces cardiac hypertrophy through Akt signaling. *Biochem Bioph Res Co*.  
811 2008;370(2):274–8.
- 812 Kalebic N, Sorrentino S, Perlas E, Bolasco G, Martinez C, Heppenstall PA.  $\alpha$ TAT1 is the major  
813  $\alpha$ -tubulin acetyltransferase in mice. *Nat Commun*. 2013;4(1):1962.
- 814 Kaul N, Soppina V, Verhey KJ. Effects of  $\alpha$ -Tubulin K40 Acetylation and Detyrosination on  
815 Kinesin-1 Motility in a Purified System. *Biophys J*. 2014;106(12):2636–43.
- 816 Li L, Zhang Q, Zhang X, Zhang J, Wang X, Ren J, et al. Microtubule associated protein 4  
817 phosphorylation leads to pathological cardiac remodeling in mice. *Ebiomedicine*.  
818 2018;37:221–35.
- 819 McLendon PM, Ferguson BS, Osinska H, Bhuiyan MdS, James J, McKinsey TA, et al. Tubulin  
820 hyperacetylation is adaptive in cardiac proteotoxicity by promoting autophagy. *Proc National  
821 Acad Sci*. 2014;111(48):E5178–86.
- 822 Nieuwenhuis J, Adamopoulos A, Bleijerveld OB, Mazouzi A, Stickel E, Celie P, et al.  
823 Vasohibins encode tubulin detyrosinating activity. *Science*. 2017;358(6369):1453–6.

- 824 Nirschl JJ, Magiera MM, Lazarus JE, Janke C, Holzbaur ELF.  $\alpha$ -Tubulin Tyrosination and  
825 CLIP-170 Phosphorylation Regulate the Initiation of Dynein-Driven Transport in Neurons.  
826 Cell Reports. 2016;14(11):2637–52.
- 827 Paturle-Lafanechère L, Manier M, Trigault N, Pirollet F, Mazarguil H, Job D. Accumulation of  
828 delta 2-tubulin, a major tubulin variant that cannot be tyrosinated, in neuronal tissues and in  
829 stable microtubule assemblies. J Cell Sci. 1994;107 ( Pt 6):1529–43.
- 830 Peris L, Wagenbach M, Lafanechère L, Brocard J, Moore AT, Kozielski F, et al. Motor-  
831 dependent microtubule disassembly driven by tubulin tyrosination. J Cell Biol.  
832 2009;185(7):1159–66.
- 833 Portran D, Schaedel L, Xu Z, Théry M, Nachury MV. Tubulin acetylation protects long-lived  
834 microtubules against mechanical ageing. Nat Cell Biol. 2017;19(4):391–8.
- 835 Prosser BL, Ward CW, Lederer WJ. X-ROS Signaling: Rapid Mechano-Chemo Transduction in  
836 Heart. Science. 2011;333(6048):1440–5.
- 837 Randazzo D, Khalique U, Belanto JJ, Kenea A, Talsness DM, Olthoff JT, et al. Persistent  
838 upregulation of the  $\beta$ -tubulin tubb6, linked to muscle regeneration, is a source of microtubule  
839 disorganization in dystrophic muscle. Hum Mol Genet. 2019;28(7):1117–35.
- 840 Sato H, Nagai T, Kuppuswamy D, Narishige T, Koide M, Menick DR, et al. Microtubule  
841 Stabilization in Pressure Overload Cardiac Hypertrophy. J Cell Biol. 1997;139(4):963–73.
- 842 Scarborough EA, Uchida K, Vogel M, Erlitzki N, Iyer M, Phyo SA, et al. Microtubules  
843 orchestrate local translation to enable cardiac growth. Nat Commun. 2021;12(1):1547.
- 844 Schuldt M, Pei J, Harakalova M, Dorsch LM, Schlossarek S, Mokry M, et al. Proteomic and  
845 Functional Studies Reveal Detyrosinated Tubulin as Treatment Target in Sarcomere  
846 Mutation-Induced Hypertrophic Cardiomyopathy. Circulation Hear Fail. 2020;14(1):e007022.
- 847 Steffensen LB, Rasmussen LM. A role for collagen type IV in cardiovascular disease? Am J  
848 Physiol-heart C. 2018;315(3):H610–25.
- 849 Swiatlowska P, Sanchez-Alonso JL, Mansfield C, Scaini D, Korchev Y, Novak P, et al. Short-  
850 term angiotensin II treatment regulates cardiac nanomechanics via microtubule modifications.  
851 Nanoscale. 2020;12(30):16315–29.
- 852 Tigchelaar W, Jong AM de, Bloks VW, Gilst WH van, Boer RA de, Silljé HHW. Hypertrophy  
853 induced KIF5B controls mitochondrial localization and function in neonatal rat  
854 cardiomyocytes. J Mol Cell Cardiol. 2016;97:70–81.
- 855 Tsutsui H, Ishihara K, Cooper G. Cytoskeletal role in the contractile dysfunction of  
856 hypertrophied myocardium. Science. 1993;260(5108):682–7.



- 857 Tsutsui H, Tagawa H, Cooper G, Takeshita A. Role of Microtubules in the Transition from  
858 Compensated Cardiac Hypertrophy to Failure. *Heart Fail Rev.* 1999;4(4):311–8.
- 859 Vistnes M, Aronsen JM, Lunde IG, Sjaastad I, Carlson CR, Christensen G. Pentosan Polysulfate  
860 Decreases Myocardial Expression of the Extracellular Matrix Enzyme ADAMTS4 and  
861 Improves Cardiac Function In Vivo in Rats Subjected to Pressure Overload by Aortic  
862 Banding. *Plos One.* 2014;9(3):e89621.
- 863 Xu Z, Schaedel L, Portran D, Aguilar A, Gaillard J, Marinkovich MP, et al. Microtubules acquire  
864 resistance from mechanical breakage through intraluminal acetylation. *Science.*  
865 2017;356(6335):328–32.
- 866 Yu X, Chen X, Amrute-Nayak M, Allgeyer E, Zhao A, Chenoweth H, et al. MARK4 controls  
867 ischaemic heart failure through microtubule detyrosination. *Nature.* 2021;1–6.
- 868
- 869 [dataset] Liu Y, Morley M, Brandimarto J, Hannenhalli S, Hu Y, Ashley EA, Tang WH,  
870 Moravec CS, Margulies KB, Cappola TP, Li M; MAGNet consortium. RNA-Seq identifies novel  
871 myocardial gene expression signatures of heart failure. *Genomics.* 2015 Feb;105(2):83-9. doi:  
872 10.1016/j.ygeno.2014.12.002.
- 873
- 874 [dataset] Schuldt M, Pei J, Harakalova M, Dorsch LM, Schlossarek S, Mokry M, Knol JC, Pham  
875 TV, Schelfhorst T, Piersma SR, Remedios C dos, Dalinghaus M, Michels M, Asselbergs FW,  
876 Moutin M-J, Carrier L, Jimenez CR, Velden J van der, Kuster DWD. Proteomic and Functional  
877 Studies Reveal Detyrosinated Tubulin as Treatment Target in Sarcomere Mutation-Induced  
878 Hypertrophic Cardiomyopathy. *Circulation Hear Fail* 2020;14:e007022.
- 879
- 880 [dataset] Doroudgar S, Hofmann C, Boileau E, Malone B, Riechert E, Gorska AA, Jakobi T,  
881 Sandmann C, Jürgensen L, Kmietczyk V, Malovrh E, Burghaus J, Rettel M, Stein F, Younesi F,  
882 Friedrich UA, Mauz V, Backs J, Kramer G, Katus HA, Dieterich C, Völkers M. Monitoring Cell-  
883 Type-Specific Gene Expression Using Ribosome Profiling In Vivo During Cardiac  
884 Hemodynamic Stress. *Circ Res* 2019;125:431–448. doi: 10.1161/CIRCRESAHA.119.314817
- 885
- 886 [dataset] Bottermann K, Leitner L, Pfeffer M, Nemmer J, Deenen R, Köhrer K, Stegbauer J,  
887 Gödecke A. Effect of cardiomyocyte and vascular smooth muscle cell specific KO of p38  
888 MAPK $\alpha$  on gene expression profile of the heart. *Gene Expression Omnibus.* ID: GSE86074

889 **Figure Captions**  
890

891 **Figure 1. Tubulin autoregulation is operant in the heart and activated in heart failure. (A)**  
892 Heatmaps of previously published mRNA (left) & protein (right) data of human  $\alpha\beta$ -tubulin  
893 isoforms during dilated (DCM)<sup>8</sup>, ischemic (ICM)<sup>8</sup>, & hypertrophic (HCM)<sup>9</sup> cardiomyopathies.  
894 **(B)** Scatter-plot of  $\log_2$ fold-change of mRNA on x-axis and  $\log_2$ fold-change of protein on y-axis  
895 in heart failure; each data point represents an average  $\log_2$ fold-change value from DCM and ICM  
896 groups from (A), and  $y = x$  represents a proportionate change between mRNA and peptide. **(C)**  
897 Schematic of tubulin autoregulation: The introns of tubulin pre-mRNA are spliced out and the  
898 mRNA is fully translated in the absence of excess free tubulin; in the presence of excess free  
899 tubulin, the mRNA, but not the pre-mRNA, is degraded. **(D)** Relative  $\log_2$ fold-change of mRNA  
900 counts of intronic (left) and exonic (right)  $\alpha\beta$ -tubulin isoforms in isolated adult mouse  
901 cardiomyocytes after treatment with either depolymerizing (Colch) or polymerizing (Tax) agents  
902 ( $n=3$ ); whiskers represent  $\pm 1$ SEM, bolded line represents mean, \* represents p-value from  
903 Welch-corrected two-tailed two-sample t-test on non-log data  $< 0.025$  (Bonferroni-corrected for  
904 two comparisons), \*\* represents  $p < 0.01$ , and \*\*\* represents  $p < 0.001$ . **(E)** Scatter-plot of  
905 relative  $\log_2$ fold-change of intron on x-axis and exon on y-axis after Colch or Tax treatment in  
906 adult mouse cardiomyocytes; whiskers represent  $\pm 1$ SEM. **(F)** Scatter-plot of relative  $\log_2$ fold-  
907 change of intron on x-axis and exon on y-axis in near-normal and failing patient heart samples;  
908 whiskers represent  $\pm 1$ SEM. **(G)** Relative Fold-Change of mRNA counts of intronic and exonic  
909  $\alpha\beta$ -tubulin isoforms in near-normal and failing patient heart samples; whiskers represent  $\pm$   
910 1SEM, bolded line represents mean, and p-values are from Welch-corrected two-tailed two-  
911 sample t-test.

912 **Figure 2. Acute  $\alpha$ - or  $\beta$ -adrenergic stimulation induces cardiac hypertrophy. (A)** Graphical  
913 scheme of the experimental plan. **(B)** Heart-weight / Tibia length (HW/TL) data of mice after 4-  
914 hour (pre-hypertrophy) ( $n=6$ ) or 4-day (hypertrophy) ( $n = \text{Ctrl}:7, \text{PE}:7, \text{Iso}:6$ ) following  
915 10mg/kg/injection of phenylephrine (PE) or 5mg/kg/injection of isoproterenol (Iso). **(C)**  
916 Representative echocardiographic M-mode images of 4-day mice hearts. **(D)** Quantification of  
917 relevant echocardiographic parameters: FS = Fractional Shortening, LVIDd = Left-Ventricular  
918 Internal Diameter at end diastole, RWT = Relative Wall Thickness, LVMI = Left-Ventricular  
919 Mass Index, LVPWd = Left-Ventricular Posterior Wall thickness at end diastole, IVSd =  
920 InterVentricular Spetal thickness at end diastole ( $n=8$ ). **(E)** Relative  $\log_2$ fold-change of nCounter  
921 mRNA counts of Immediate Early Genes (IEGs), hypertrophic stress markers, and genes of fetal  
922 reprogramming ( $n = 4\text{h}: 6, 4\text{d}: \text{Ctrl}:7, \text{PE}:7, \text{Iso}:6$ ). For all box plots, whiskers represent  $\pm 1$ SEM  
923 and bolded-lines represent mean. For (B) and (D), \* represents p-value from Welch-corrected  
924 two-tailed two-sample student's t-test  $< 0.025$ , \*\* represents  $p < 0.01$ , and \*\*\* represents  $p <$   
925  $0.001$ . For (E), \* represents Bonferroni adjusted (for 45 genes) p-value  $< 0.025$  (Bonferroni-  
926 corrected for two comparisons), \*\* represents  $\text{adj\_}p < 0.01$ , and \*\*\* represents  $\text{adj\_}p < 0.001$   
927 (see Methods for more statistical details).

928 **Figure 3. The microtubule network is rapidly detyrosinated upon hypertrophic**  
929 **stimulation.** Representative immunoblots and relative fold-change of  $\alpha$ -tubulin (**left**) and  $\beta$ -  
930 tubulin (**right**) in **(A)** total proteins, **(B)** free or **(C)** polymerized -tubulin fractions ( $n=6$ ).  
931 Representative immunoblots with technical duplicate lanes and relative fold-change using

932 GAPDH (**left**) or  $\alpha$ -tubulin (**right**) as loading controls for (**D**) acetylated  $\alpha$ -tubulin, (**E**)  
933 detyrosinated  $\alpha$ -tubulin, (**F**)  $\Delta 2$   $\alpha$ -tubulin, (**G**) polyglutamylated  $\alpha$ -tubulin, & (**H**) polyglycylated  
934 pan-tubulin (n=6). For all bar plots, whiskers represent + 1SEM and bar represents mean. For all  
935 graphs, \* represents p-value from Welch-corrected two-tailed two-sample t-test < 0.025  
936 (Bonferroni-corrected for two comparisons), \*\* represents p < 0.01, and \*\*\* represents p <  
937 0.001.

938 **Figure 4. Total tubulin content increases & the microtubule network densifies during**  
939 **hypertrophy.** Representative immunoblots and relative fold-change of  $\alpha$ -tubulin (**left**) and  $\beta$ -  
940 tubulin (**right**) in the (**A**) total proteins, (**B**) free, or (**C**) polymerized -tubulin fractions (n =  
941 Ctrl:7, PE:7, Iso:6). Representative immuno- blots with technical duplicate lanes and relative  
942 fold-change using GAPDH (**left**) or  $\alpha$ -tubulin (**right**) as loading controls for (**D**) acetylated  $\alpha$ -  
943 tubulin, (**E**) detyrosinated  $\alpha$ -tubulin, (**F**)  $\Delta 2$   $\alpha$ -tubulin, (**G**) polyglutamylated  $\alpha$ -tubulin, & (**H**)  
944 polyglycylated pan-tubulin (n = Ctrl:7, PE:7, Iso:6). For all bar plots, whiskers represent +  
945 1SEM and bar represents mean; \* represents p-value from Welch-corrected two-tailed two-  
946 sample t-test < 0.025 (Bonferroni-corrected for two comparisons), \*\* represents p < 0.01, and  
947 \*\*\* represents p < 0.001.

948 **Figure 5. Differential expression of tubulin isoforms, modifying enzymes and MAPs during**  
949 **the onset and establishment of hypertrophy.** (**A**) MS counts of unique peptides of detectable  
950  $\alpha\beta$ -tubulin isoforms at 4-day. For all following box plots, whiskers represent  $\pm$  1SEM and bolded  
951 line represents mean. (**B**) Relative  $\log_2$ fold-change of  $\alpha\beta$ -tubulin isoforms peptide counts at 4-  
952 day (n = Ctrl:5, PE:5, Iso:4); \* represents p-value from Welch-corrected two-tailed two-sample t-  
953 test on non-log data < 0.025 (Bonferroni-corrected for two comparisons), \*\* represents p < 0.01,  
954 and \*\*\* represents p < 0.001. (**C**) relative  $\log_2$ fold-change of nCounter mRNA counts of  
955 detectable tubulin isoforms at 4-hour (**left**) (n=6) and 4-day (**right**) (n = Ctrl:7, PE:7, Iso:6); \*  
956 represents Bonferroni adjusted (for 50 genes) p-value < 0.025, \*\* represents adj\_p < 0.01, and  
957 \*\*\* represents adj\_p < 0.001 (see Methods & Materials for more statistical details). (**D**) Scatter-  
958 plot of  $\log_2$ fold-change of mRNA on x-axis and  $\log_2$ fold-change of protein on y-axis at 4-day;  
959 whiskers represent  $\pm$  1SEM and y = x represents a proportionate change between mRNA and  
960 peptide. Relative  $\log_2$ fold-change of nCounter mRNA counts of (**E**) detyrosinase complex and  
961 tyrosinase, & (**F**) MAPs, anterograde, & retrograde motors at 4-hour (n=6) and 4-day (n = Ctrl:7,  
962 PE:7, Iso:6); \* represents Bonferroni adjusted (for 50 genes) p-value < 0.025, \*\* represents  
963 adj\_p < 0.01, and \*\*\* represents adj\_p < 0.001 (see Methods for more statistical details).

964 **Figure 6. Tubulin isoforms are differentially regulated at the mRNA level through isoform-**  
965 **specific transcription and/or autoregulation during cardiac hypertrophy.** Relative  $\log_2$ fold-  
966 change of mRNA counts of  $\alpha\beta$ -tubulin isoforms that are predominantly regulated through (**A**)  
967 autoregulation, or (**B**) transcription (n = 4h: 6, 4d: Ctrl:7, PE:7, Iso:6); \* represents p-value from  
968 Welch-corrected two-tailed two-sample t-test on non-log data < 0.025 (Bonferroni-corrected for  
969 two comparisons), \*\* represents p < 0.01, and \*\*\* represents p < 0.001. Scatter-plots of relative  
970  $\log_2$ fold-change of intron on x-axis and exon on y-axis at (**C**) 4-hour and (**D**) 4-day; whiskers  
971 represent  $\pm$  1SEM.

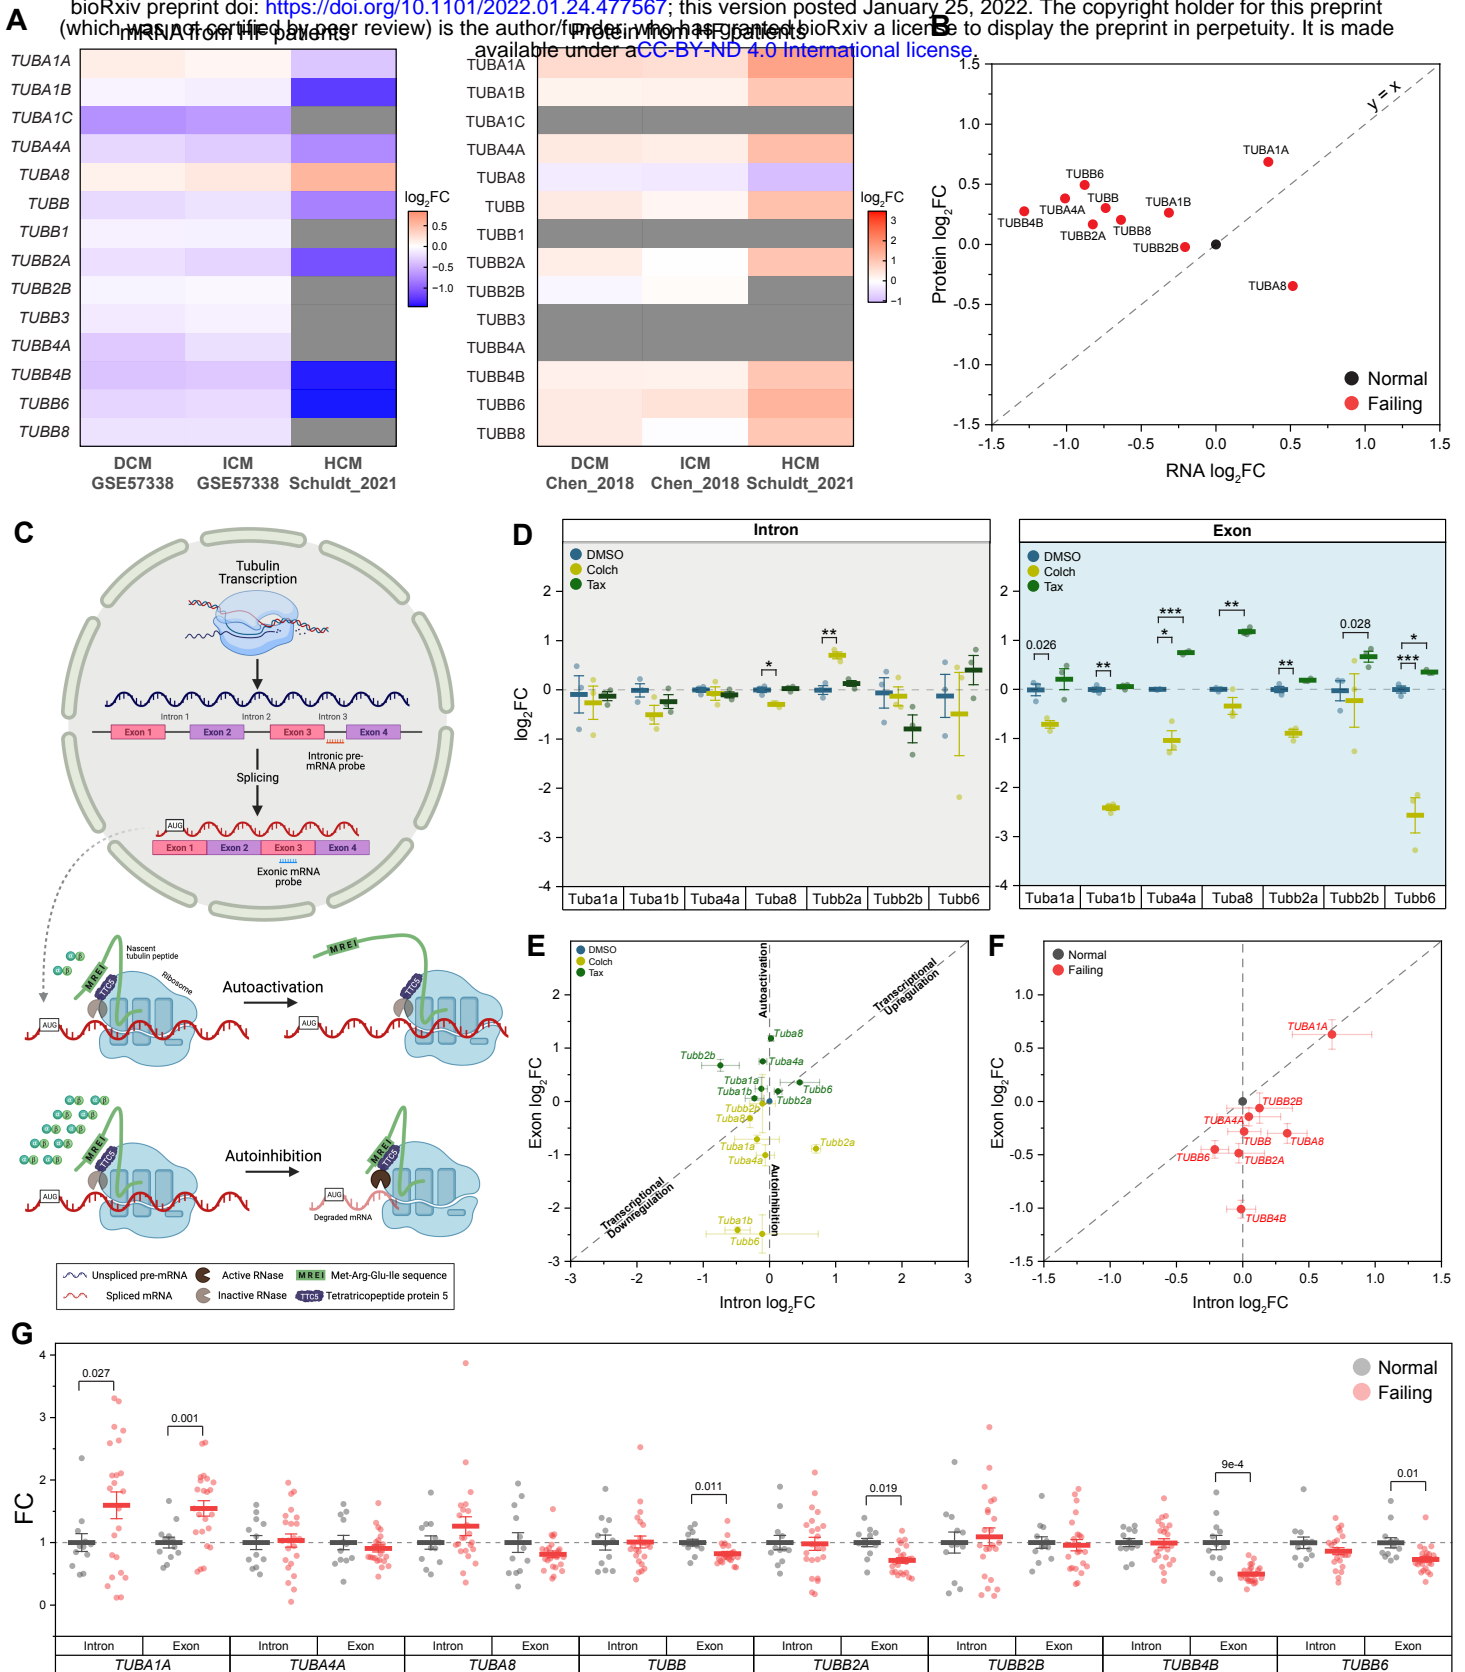

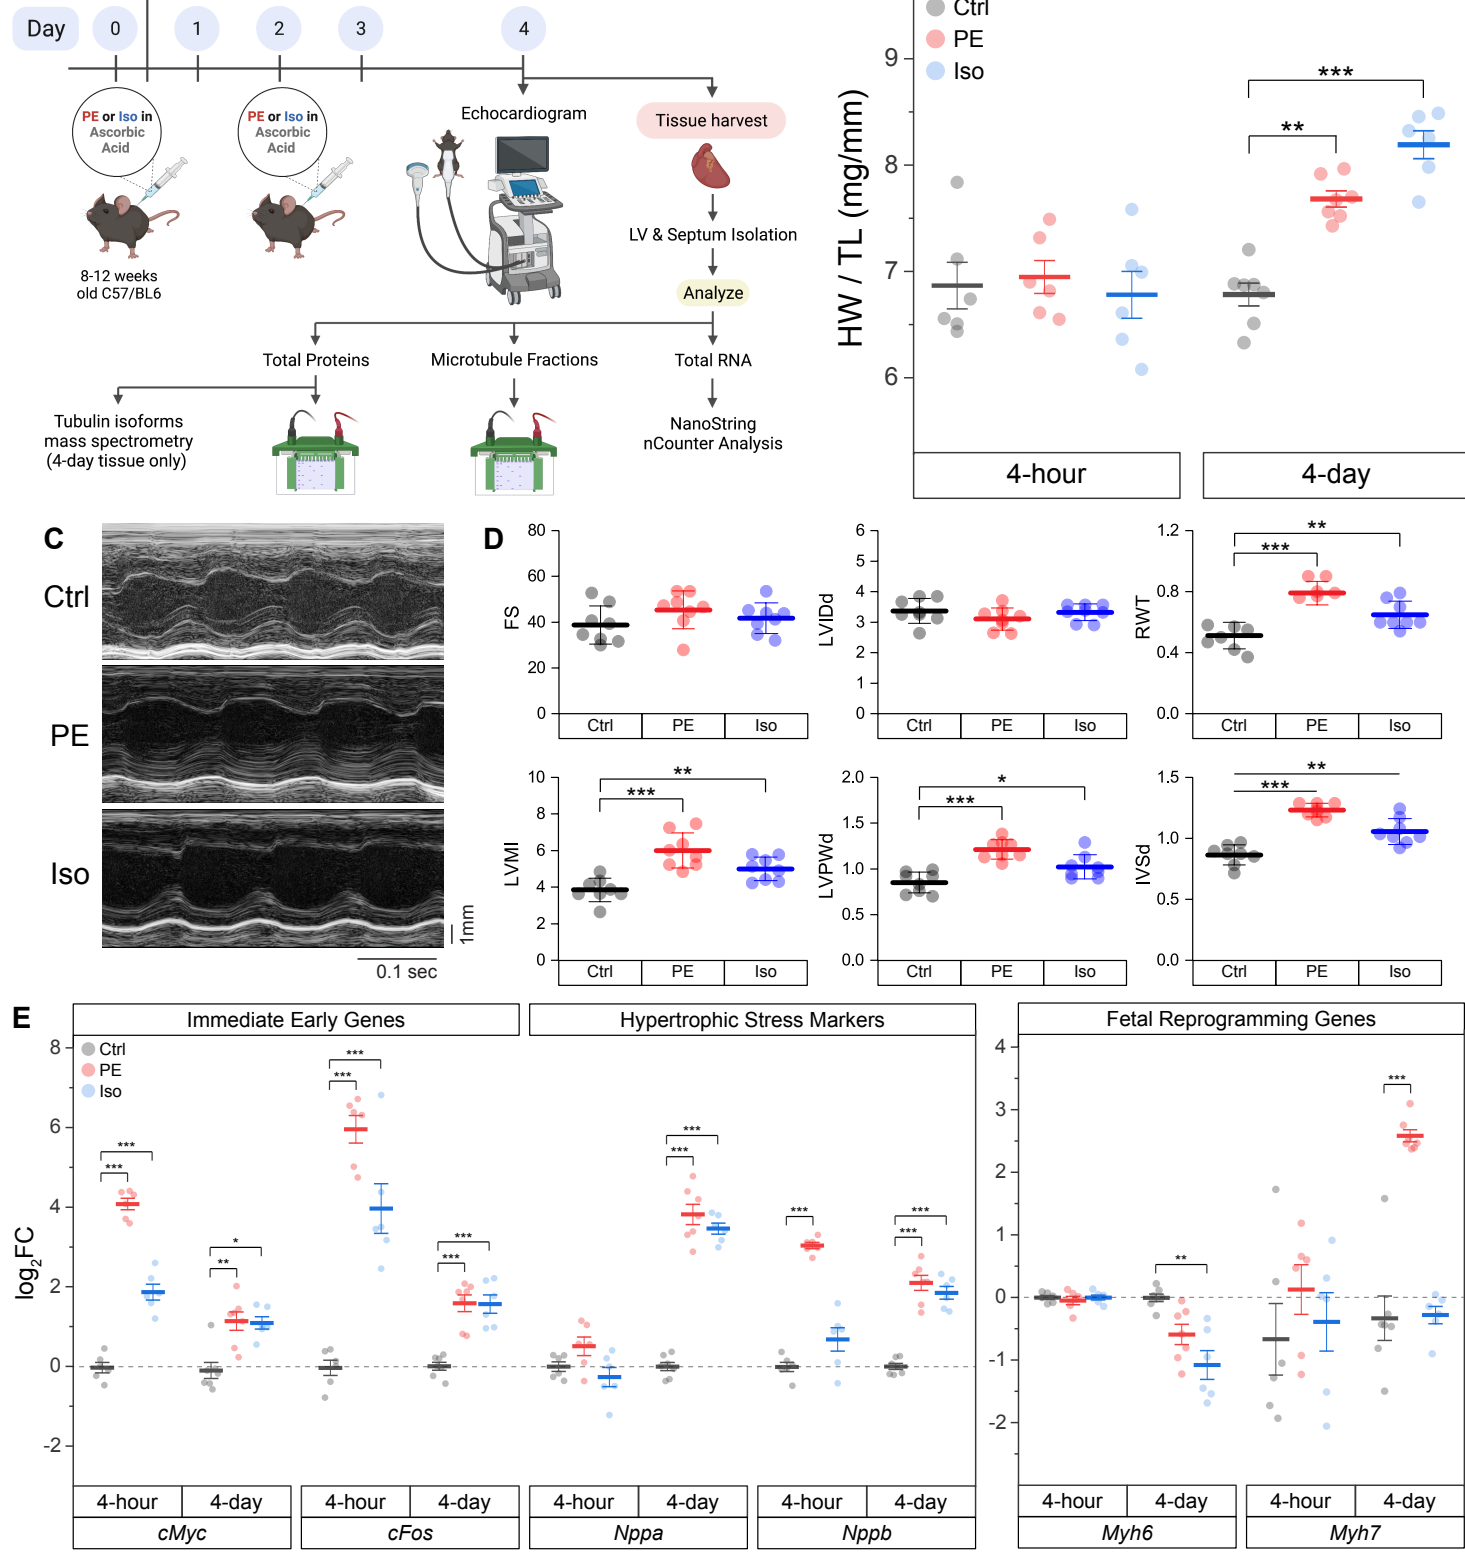

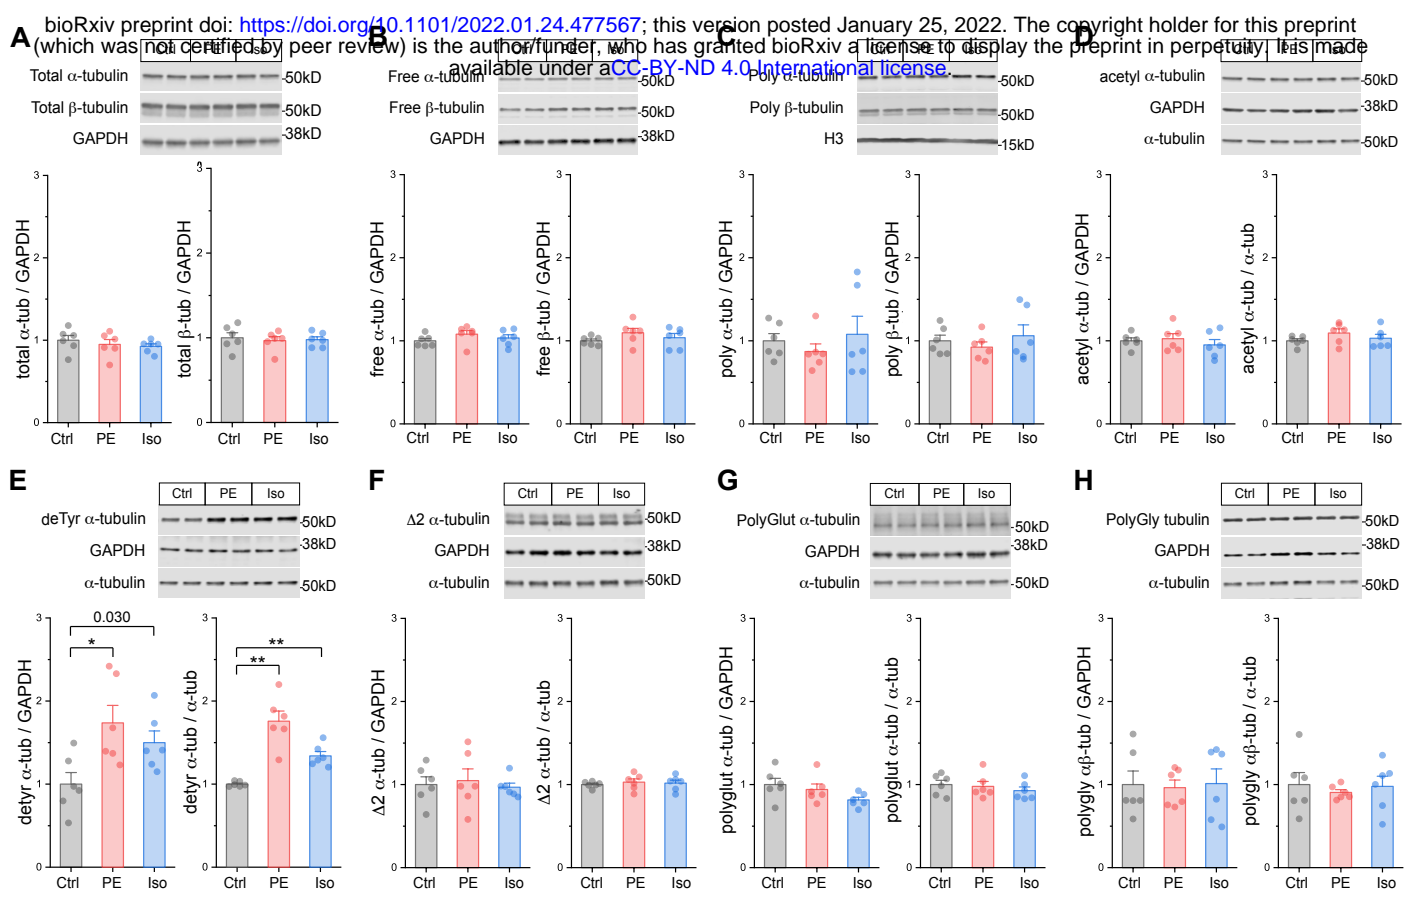

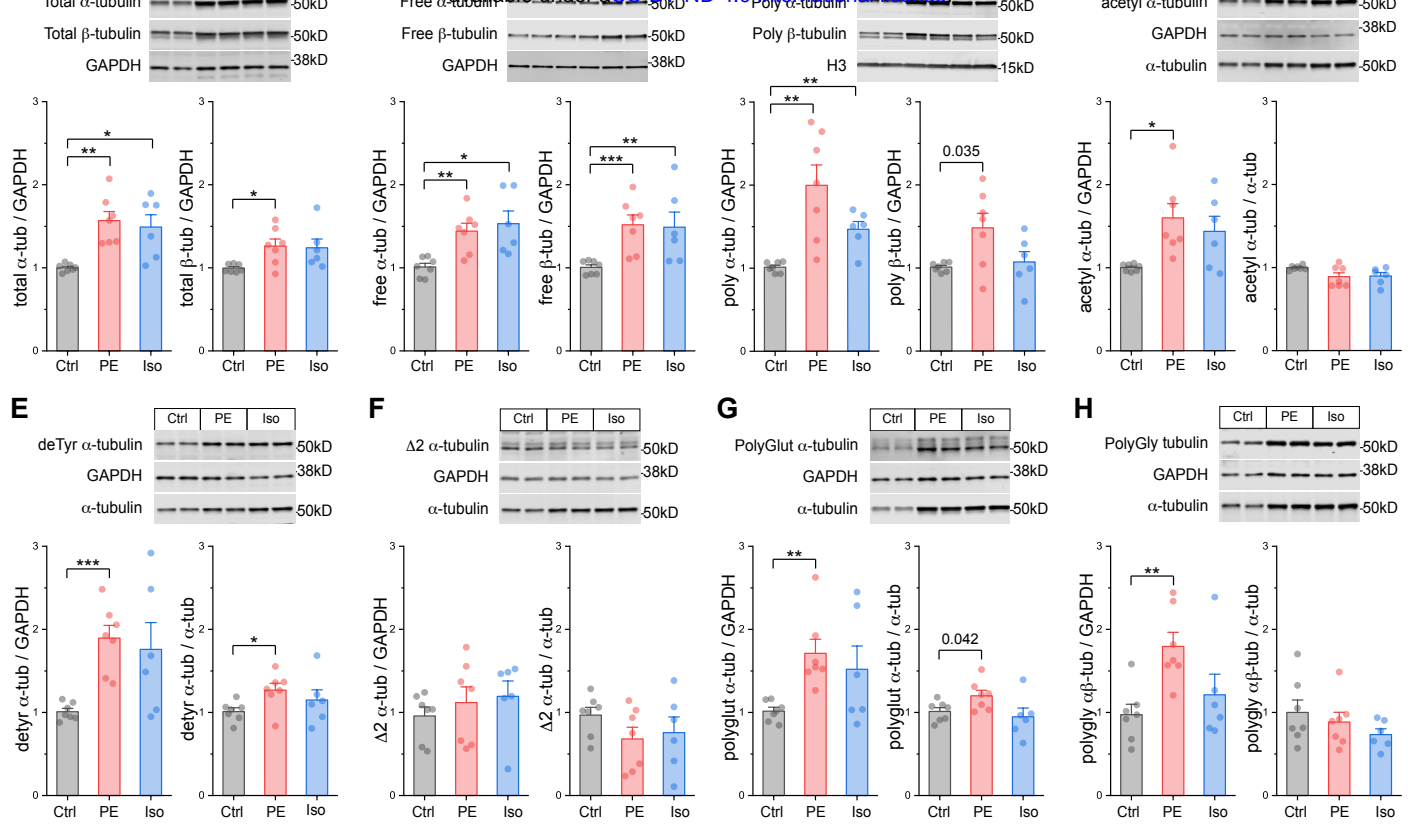

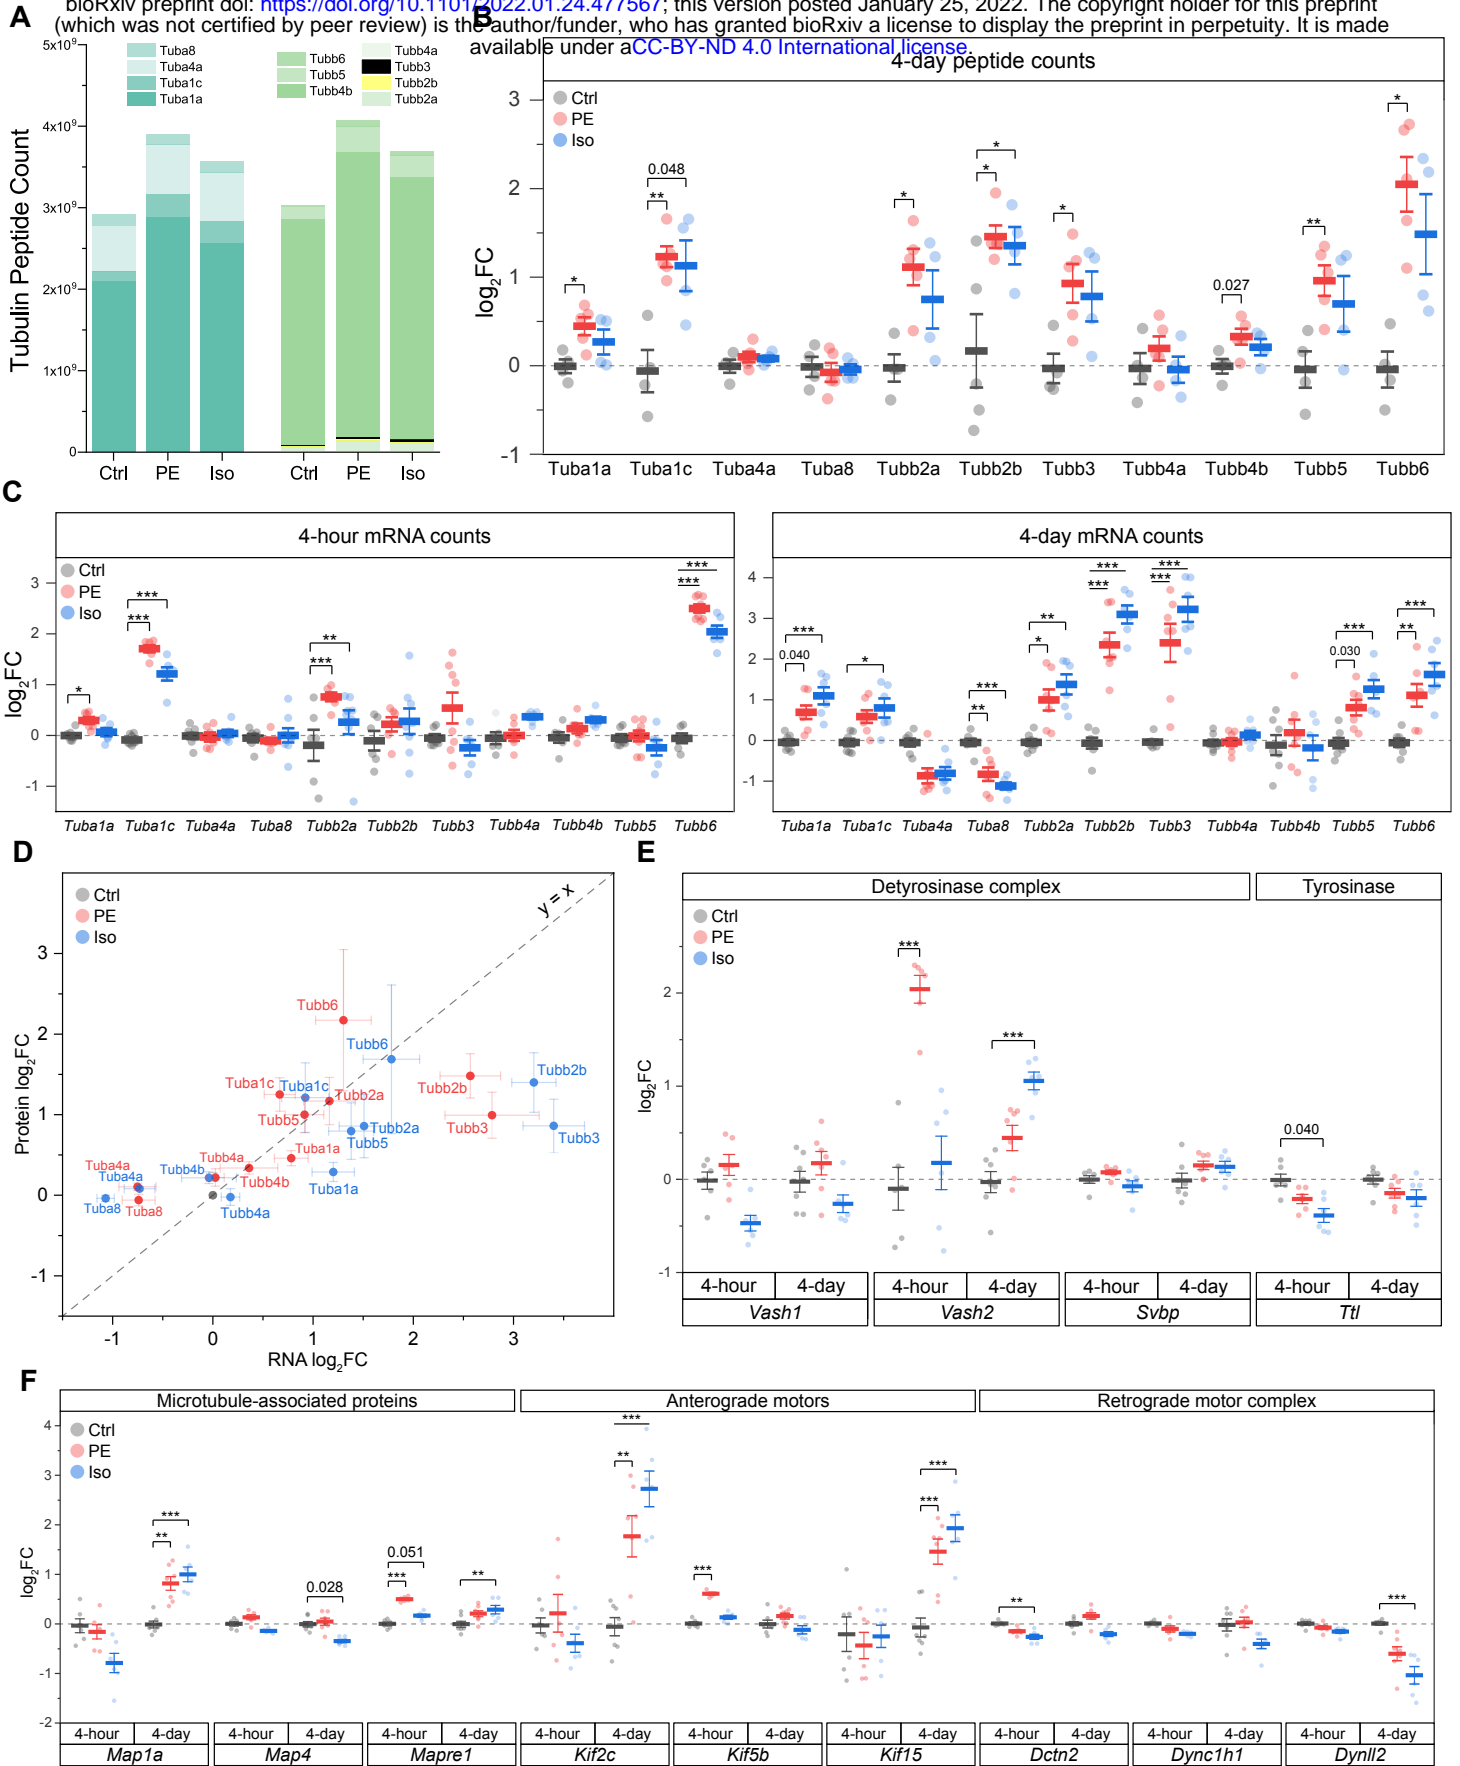



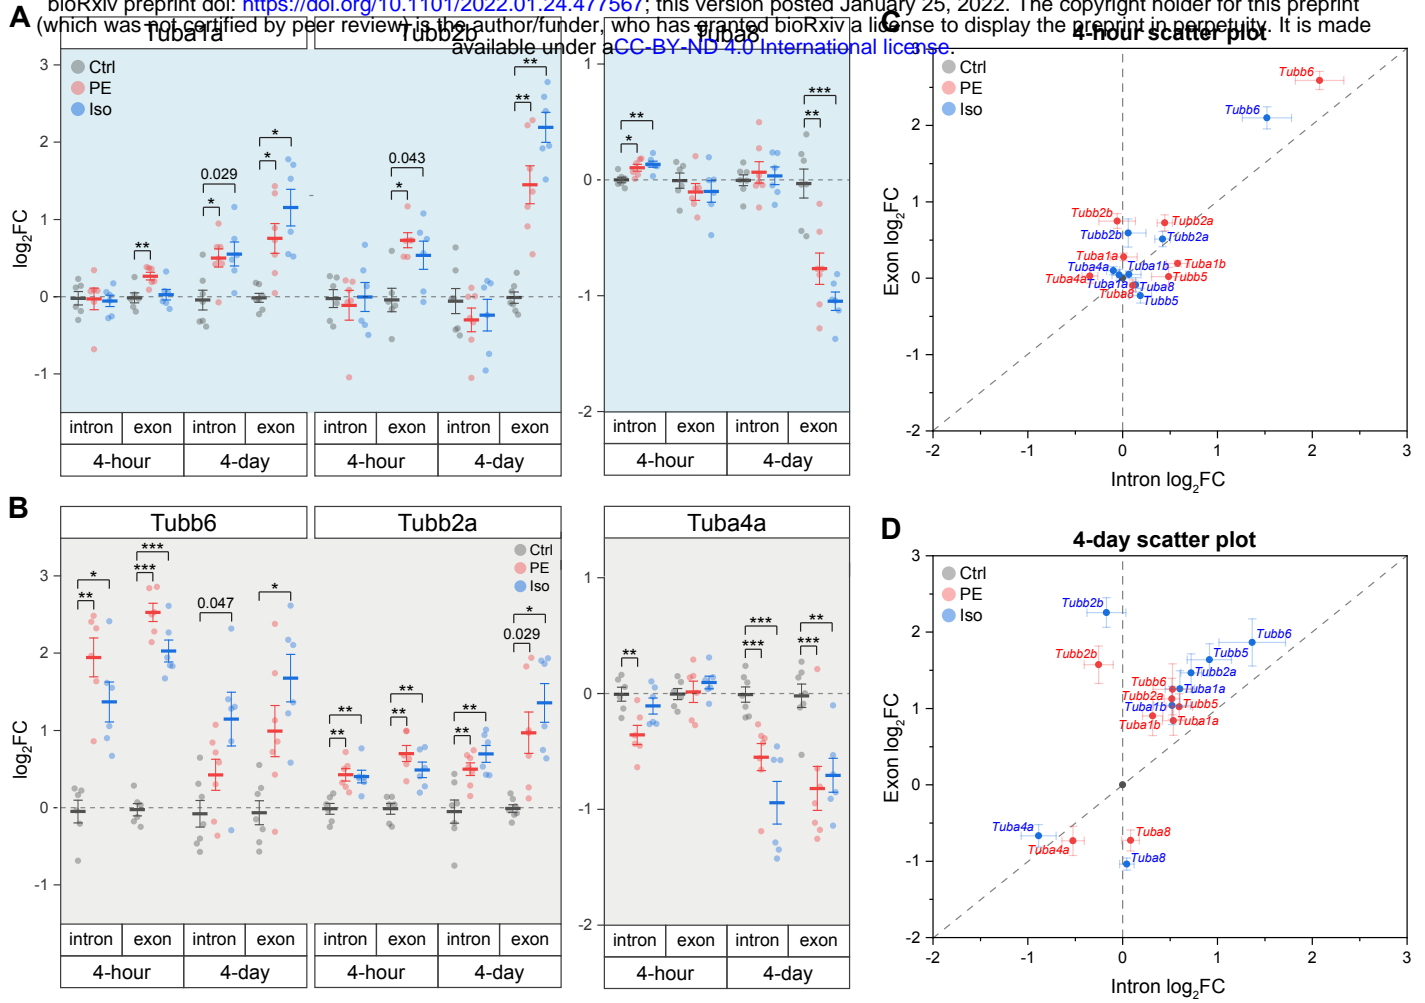

Source: https://www.biorxiv.org/content/10.1101/2022.01.24.477567v1.full.pdf
